# Supplementary material for: Regional-scale phytoplankton dynamics and their association with glacier meltwater runoff in Svalbard
Source: Copernicus journal article supplement (doi:10.5194/bg-2021-181), 2021-07-20
Supplement: Supplementary file [file bg-2021-181-AC2-supplement.pdf]

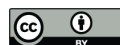

# Regional-scale phytoplankton dynamics and their association with glacier meltwater runoff in Svalbard

Thorben Dunse<sup>1,2</sup>, Kaixing Dong<sup>3</sup>, Kjetil Schanke Aas<sup>2</sup>, and Leif Christian Stige<sup>3,4</sup>

<sup>1</sup>Department of Environmental Sciences, Western Norway University of Applied Science, Røyrgata 6, 6856 Sogndal, Norway

<sup>2</sup>Department of Geosciences, University of Oslo, PO Box 1047 Blindern, NO-0316 Oslo, Norway

<sup>3</sup>Centre of Ecological and Evolutionary Synthesis (CEES), Department of Biosciences, University of Oslo, PO Box 1066 Blindern, NO-0316, Oslo, Norway

<sup>4</sup>Norwegian Veterinary Institute, PO Box 64, NO-1431 Ås, Norway

**Correspondence:** Thorben Dunse (thorben.dunse@hvl.no)

**Abstract.** Arctic amplification of global warming has accelerated mass loss of Arctic land ice over the past decades and lead to increased freshwater discharge into glacier fjords and adjacent seas. Glacier freshwater discharge is typically associated with high sediment loads which limits the euphotic depth, but may also provide surface waters with essential nutrients, thus having counter-acting effects on marine productivity. In-situ observations from a few measured fjords across the Arctic indicate that glacier fjords dominated by marine-terminating glaciers are typically more productive than those with only land-terminating glaciers. Here we combine chlorophyll *a* from satellite ocean colour, an indicator of phytoplankton biomass, with glacier meltwater runoff from climatic mass-balance modelling to establish a statistical model of summertime-phytoplankton dynamics in Svalbard (mid-June to September). Statistical analysis reveals positive spatiotemporal association of chlorophyll *a* with glacier runoff for 7 out of 14 primary hydrological regions. These regions consist predominantly of the major fjord systems of Svalbard. The adjacent land areas are characterized by a wide range of total glacier coverage (35.5% to 81.2%) and fraction of marine-terminating glacier area (40.2% to 87.4%). We find that an increase in specific glacier-runoff rate of 10 mm water equivalent per 8-day timeperiod raises summertime chlorophyll *a* concentrations by 5.2% to 20.0%, depending on region. During the annual peak discharge we estimate that glacier runoff contributes to 13.1% to 50.2% increase in chlorophyll *a* compared to situations with no runoff. This suggest that glacier runoff is an important factor sustaining summertime phytoplankton production in Svalbard fjords, in line with findings from several fjords in Greenland. In contrast, for regions bordering open coasts, and beyond 10 km distance from the shore, we do not find significant association of chlorophyll *a* with runoff. In these regions, physical ocean and sea ice variables control chlorophyll *a*, pointing at the importance of a late sea ice breakup in northern Svalbard, as well as the advection of Atlantic water masses along the West Spitsbergen Current for summertime phytoplankton dynamics. Our method allows for investigation and monitoring of glacier-runoff effects on primary production throughout the summer season and is applicable on a Pan-Arctic scale, thus complementing valuable but scarce in-situ measurements in both space and time.

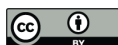

## 1 Introduction

The Arctic cryosphere is experiencing rapid transitions due to Arctic amplification of global warming. Climate change is reflected in changing oceanic and atmospheric circulation patterns, permafrost degradation, decline in sea ice thickness and extent, as well as shrinking glaciers (AMAP, 2017, IPCC, 2019). Over the past few decades, glaciers and ice caps in the Arctic have retreated and lost mass at accelerating rates (e.g., Hugonnet et al., 2021), including glaciers in Svalbard (Schuler et al., 2020). A long-term trend of increased mass loss is also observed for the Greenland ice sheet, despite of a temporary slowdown of mass loss in 2013–2017 (IMBIE Team, 2019). Ice mass loss in form of glacial meltwater runoff or frontal ablation, i.e. iceberg calving and submarine melt, constitutes a significant source of freshwater being discharged into glacial fjords and adjacent seas (Bamber et al., 2018). This glacier freshwater discharge has implications for the physical oceanographic conditions (Straneo and Cenedese, 2015; Carroll et al., 2017) and the biogeochemistry of water masses (Wadham et al., 2013; Hopwood et al., 2016), which affects the biological productivity in the fjords and the ocean (Etherington et al., 2007; Juul-Pedersen et al., 2015; Arendt et al., 2016; Meire et al., 2016, 2017; Calleja et al., 2017; Kanna et al., 2018; Hegseth et al., 2019; Hopwood et al., 2018, 2020).

Arctic marine ecosystems display strong seasonal cycles in productivity and functioning due to pronounced seasonality of environmental variables such as solar radiation, sea ice concentration, sea-surface temperature and salinity, as well as terrestrial freshwater input (Sakshaug, 2004). Marine primary production, i.e. the generation of phytoplankton biomass, ultimately depends on the availability of light and the supply of essential, 'limiting' nutrients (Sakshaug, 2004; Hopwood et al., 2020). Seasonal changes in any of these factors lead to periods of high or low primary production (Sakshaug, 2004; Arrigo and van Dijken, 2015). A characteristic 'phytoplankton spring bloom' follows the rapid increase in incoming solar radiation after the polar night, combined with high initial nutrient levels and the development of a weak stratification (e.g., Sakshaug, 2004; Juul-Pedersen et al., 2015; Meire et al., 2016). The persistence of sea ice, with or without snow cover, may delay the penetration of light into the water column and thus the phytoplankton spring bloom (Sakshaug, 2004; Rysgaard and Nielsen, 2006).

Stratification relies on a positive gradient in potential water density with depth, which is controlled by salinity and temperature. Stratification during spring bloom is due to freshwater input, mainly from melting of sea ice, as well as solar heating. Stratification ensures that the phytoplankton remains within the euphotic zone, i.e. the upper part of the water column where sufficient light is available for photosynthesis. Stratification favors primary production at an initial stage, but also limits nutrient supply from intermediate-depth water (Tremblay et al., 2006, 2008). Nutrient depletion and increased grazing pressure by a growing zooplankton population terminate the spring bloom and lead to post-spring bloom minima in phytoplankton concentrations (Juul-Pedersen et al., 2015; Meire et al., 2016). New production of phytoplankton during summer requires a steady supply of limiting nutrients to the euphotic zone, either by mobilization of nutrients from deeper water layers or input from external sources, such as dust storms (Prospero et al., 2012), coastal erosion and river discharge (Terhaar et al., 2021).

Glacial freshwater discharge enters the fjord or coastline either via pro-glacial rivers fed by runoff from land-terminating glaciers, or via frontal ablation and runoff from marine-terminating glaciers. These tidewater glaciers are typically highly crevassed, so that most of the meltwater percolates into the glacier and is discharged subglacially at the glacier grounding

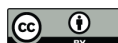

line, where it is injected into the fjord at depth. Glacier runoff can have counteracting effects on the productivity of Arctic fjords (e.g. Hopwood et al., 2020). Glacier runoff may be a direct source of nutrients to downstream ecosystems, for example bioavailable iron, nitrate or phosphate (Hodson et al., 2005; Bhatia et al., 2013; Hawkings et al., 2015; Meire et al., 2016; Dubnick et al., 2017; Milner et al., 2017; Hopwood et al., 2018). However, glacial meltwater is generally characterized by low  
 60 nutrient concentrations in comparison with the ambient seawater (Halbach et al., 2019; Hopwood et al., 2020). In addition, glacier runoff is typically associated with high sediment loads, which limit the light penetration into the water column and thereby the extent of the euphotic zone. The euphotic depth is usually defined as the depth at which incoming solar radiation has attenuated to a level of 1% compared to that received by the surface. In Svalbard, the euphotic depth may vary from less than about 0.3 m within subglacial discharge plumes near glacier calving fronts to more than 30 m in the outer parts of the  
 65 fjords (Svendsen et al., 2002; Piquet et al., 2014; Halbach et al., 2019). Poor light conditions near glacier fronts thus limit primary production (Zajaczkowski and Wlodarska-Kowalczyk, 2007; Svendsen et al., 2002; Calleja et al., 2017; Hegseth et al., 2019). With increasing distance from the glaciers or pro-glacial river, light conditions become more favorable as progressively more sediments settle out. Phytoplankton growth will then mainly depend on the steady supply of the euphotic zone with limiting nutrients (Halbach et al., 2019; Hopwood et al., 2020).

70 The effect of glacier runoff on vertical mixing provides an indirect mechanisms by which to fertilize the marine ecosystem. Subglacial discharge drives buoyant upwelling of plumes near the calving front of tidewater glaciers, which lead to entrainment of large volumes of ambient seawater from all depth levels, thereby supplying nutrient-depleted surface layers with nutrients from nutrient-rich deep water layers (Meire et al., 2017; Kanna et al., 2018; Hopwood et al., 2018, 2020). A study by Hopwood et al. (2018) suggests that this ‘nutrient pump’ may provide the euphotic zone with two orders of magnitudes more nutrients  
 75 than what is directly supplied by the glacial meltwater. Glacier runoff may also enhance the general estuarine circulation within fjords and embayments, which is considered to have positive effects on biological productivity (Rysgaard et al., 2003; Juul-Pedersen et al., 2015; Meire et al., 2016). Down-fjord katabatic winds facilitate export of brackish/low-density surface water out of the fjord and lead to a compensating return flow of nutrient-rich saline water at depth (Svendsen et al., 2002; Cottier et al., 2010; Straneo and Cenedese, 2015; Spall et al., 2017; Sundfjord et al., 2017). In either case, positive effects of glacier  
 80 runoff on primary productivity are expected to occur only where suspended particles have settled deeper into the water column and light conditions in surface waters become more favorable (Etherington et al., 2007; Lydersen et al., 2014; Halbach et al., 2019).

Recent studies have shown that tidewater glaciers sustain high primary production throughout summer in Greenland fjords and coastal waters (Juul-Pedersen et al., 2015; Arendt et al., 2016; Meire et al., 2016; Arrigo et al., 2017; Meire et al., 2017).  
 85 In Godthåbsfjord, a sub-Arctic tidewater glacier fjord in SW Greenland, Juul-Pedersen et al. (2015) observed a secondary peak in primary production, or ‘summer bloom’ that coincided with substantial runoff from the Greenland Ice Sheet. This summer bloom may be of similar magnitude, or even exceed the spring bloom. Similar findings are available from Glacier Bay, Alaska (Etherington et al., 2007). On Svalbard, glacier runoff is known to affect the distribution and species composition of phytoplankton (Piquet et al., 2014; van de Poll et al., 2018), but it is a matter of debate whether or not glacier runoff facilitates  
 90 higher productivity during summer (Halbach et al., 2019).

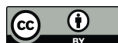

In-situ studies across the Arctic show a large variability in marine primary production in response to glacier runoff for individual fjord systems, due to distinct fjord geometry, glacier configuration of marine and land-terminating glaciers, oceanographic and climatic setting (Hopwood et al., 2018, 2020). Glacial fjords dominated by tidewater glaciers appear to have a higher productivity than those dominated by land-terminating glaciers (Meire et al., 2017; Hopwood et al., 2020), underpinning the importance of subglacial upwelling. In-situ observations are only available for selected fjords and often limited in time, capturing a snapshot during summertime. This highlights the need for innovative long-term monitoring programs of proglacial marine-ecosystems (Straneo et al., 2019). In addition, efforts should be taken to up-scale local in-situ observations in space and time. This can be achieved by the application of modelling approaches and/or satellite remote sensing.

This study aims to investigate the overall effects of glacier runoff on phytoplankton dynamics and marine primary productivity in Svalbard, focusing on a regional, rather than local scale. We utilize a 10-year timeseries of glacier runoff from high-resolution climatic mass balance simulations of all glaciers in Svalbard for the timeperiod 2003–2013 (Aas et al., 2016) and chlorophyll *a* concentrations from satellite ocean-colour, an indicator of phytoplankton biomass (Moses et al., 2009; Maitra et al., 2013; Kahru et al., 2014; Lee et al., 2015). Chlorophyll *a* products and other physical ocean variables, including sea surface temperature (SST) and sea ice fraction (SIF), are available through the Copernicus Marine Environment Monitoring Service (CMEMS). We use a statistical model to identify significant associations of chlorophyll *a* with runoff, while accounting for the potentially confounding effects of physical ocean and sea ice variables that may covary with runoff. We focus on the summer melt period, from mid-June to September, anticipating that this period follows the termination of the spring bloom. Specifically, we investigate whether there are significant associations between runoff and chlorophyll *a* in coastal waters around Svalbard, and if there are spatial variations in association strength, e.g. with respect to regional characteristics or distance to coast.

## 2 Research region

The Svalbard archipelago in the Eurasian Arctic is bordered by the Barents Sea to the east, the Greenland Sea to the west and the Arctic Ocean to the north (Fig. 1). The climate in Svalbard is relatively warm, given its high Arctic location. This is due to the West Spitsbergen Current (WSC), an extension of the North Atlantic Current, which transports warm Atlantic water up north along the West Spitsbergen Shelf (Svendsen et al., 2002; Walczowski and Piechura, 2011, Fig. 1a). The eastern side of Svalbard is dominated by the East Spitsbergen Current (ESC), which transports cold Arctic water clockwise around the southern tip of Spitsbergen (Loeng and 1991; Svendsen et al., 2002). It continues northwards on the West Spitsbergen Shelf, forming a coastal current, which is subsequently freshened by the export of brackish surface water from the fjords (Svendsen et al., 2002; Nilsen et al., 2016, Fig. 1a).

From 1971 to 2017, Svalbard has experienced strong atmospheric warming by 3–5°C (Hanssen-Bauer et al., 2019), evident in all seasons, but most pronounced during winter and spring (Nordli et al., 2014). Strong atmospheric warming is attributed to a general decline in sea ice and an increase in sea-surface temperatures (Isaksen et al., 2016). Climate projections under medium





to high emission scenarios indicate that air temperatures may rise by 7–10°C until 2071–2100, as compared to 1971–2000, which may lead to a five-fold increase in glacier mass loss (Hanssen-Bauer et al., 2019).

125 57% (34000 km<sup>2</sup>) of the total land area on Svalbard is covered by glaciers and ice caps, and 68% of the glacierized area drains into the ocean through tidewater glaciers with a total calving-front length of ~740 km (Nuth et al., 2013). The degree of glacier coverage and the size of individual glaciers reflects the general climatic gradient across Svalbard. Glaciers in the southern and western parts, characterized by relatively warm atmospheric and oceanic conditions, are generally smaller than glaciers in the north-eastern parts of Svalbard, where colder climatic conditions prevail. Consequently, the total glacier coverage is lower in the southern and western parts, with a minimum in the dry central parts of Spitsbergen (Nuth et al., 2013). Overall, glacier in Svalbard have been losing mass since the 1960's, with a pronounced increase in mass loss since the 2000's (Schuler et al., 2020). A compilation of available mass balance assessments for the period 2000–2019 reveals a total mass balance of  $-8 \pm 6 \text{ Gt a}^{-1}$ , of which  $-7 \pm 4 \text{ Gt a}^{-1}$  are attributed to the climatic mass balance and  $-2 \pm 7 \text{ Gt a}^{-1}$  to the poorly constrained frontal ablation, i.e. iceberg calving and submarine melt (Schuler et al., 2020). The climatic mass balance simulation by Aas et al. (2016), from which we extract glacier runoff, is included in this reconciled mass balance estimate. For the period 2003–2013, Aas et al. (2016) found a mean annual mass balance of about  $-8.7 \text{ Gt}$ , which is well within the error margins of the consensus estimate by Schuler et al. (2020).

Fjords in Svalbard are affected by terrestrial freshwater discharge, on one hand, and the exchange of water masses with the adjacent shelf, on the other hand (Svendsen et al., 2002; Cottier et al., 2005; Nilsen et al., 2016; Sundfjord et al., 2017). Glacier ablation constitutes the major component of the terrestrial freshwater discharge into Svalbard fjords (Pramanik et al., 2018; van Pelt et al., 2019). During the summer melt season, glacier runoff enters the fjord in the form of surface runoff and subglacial discharge, in addition to iceberg calving and submarine melt. This freshwater mixes with ambient fjord water to form a layer of brackish surface waters, its thickness typically decreasing from the head towards the mouth of the fjord (Svendsen et al., 2002). The exchange of water masses between the fjords and shelf depends on stratification and wind-stress, as well as the presence or absence of a topographic barrier, e.g. in form of a sill at the fjord mouth (Cottier et al., 2010). The dominating wind field in Svalbard fjords is down-fjord, due to katabatic winds and orographic steering of the large-scale wind-field (Svendsen et al., 2002; Cottier et al., 2005). This drives brackish surface water out of the fjord and a compensating inflow of Atlantic water from the shelf, thereby stimulating estuarine circulation and vertical mixing of water masses (Svendsen et al., 2002; Cottier et al., 2010; Sundfjord et al., 2017). Changes in atmospheric circulation patterns since the early 2000's have caused repeated overflow of the WSC onto the West Spitsbergen Shelf and inflow of warm saline Atlantic water masses into some of the major fjords, with implications for water mass composition and heat content, significantly reducing sea ice production during wintertime (Cottier et al., 2007; Nilsen et al., 2016). Svalbard fjords can be regarded as broad fjords, i.e. fjord circulation is influenced by rotational dynamics or 'Coriolis' effects (Svendsen et al., 2002; Cottier et al., 2010).

For our regional-scale assessment of glacier-runoff effects on phytoplankton dynamics and marine primary production, we consider 14 primary drainage basins or hydrological regions of Svalbard (Fig. 1a), following the most recent Svalbard glacier inventory (Nuth et al., 2013; König et al., 2014). The identification system follows Hagen et al. (1993), where the first digit represents one out of five major areas: (1) Spitsbergen, (2) Nordaustlandet, (3) Barentsøya, (4) Edgeøya, (5) Kvitøya, the



latter of which is not included in this study. The second and third digits indicate the primary and secondary drainage basins, respectively. For each hydrological region, we distinguish between different marine zones, defined by their distances from the coast, namely 0 to 10 km, 10 to 20 km and 20 to 50 km. The innermost zone contains most of the fjords, which typically have a width of less than 20 km. The outer regions beyond 10-km distance from the coast extend into the open ocean. Along the western and northern side of Spitsbergen, the 50 km offshore-distance contourline corresponds approximately with the shelf edge. In addition to the primary hydrological regions, we consider one subregion near the research hub of Ny Ålesund in NE Spitsbergen (15). The Kongsfjorden-Krossfjorden system consists of two secondary drainage basins, Kongsfjorden (155), and Krossfjorden (156) and serves as a key site for interdisciplinary studies on glacier-ocean interactions, focusing on physical oceanographic conditions in response to glacier runoff (Svendsen et al., 2002; Cottier et al., 2005; Sundfjord et al., 2017; Torsvik et al., 2019) and their implications for the marine ecosystem (Lydersen et al., 2014; Piquet et al., 2014; Calleja et al., 2017; Halbach et al., 2019; Hegseth et al., 2019).

### 3 Material and Methods

#### 3.1 Climatic glacier mass balance and meltwater runoff

We extract regional glacier meltwater runoff from a 10-year simulation of the climatic mass balance of all glaciers in Svalbard, later referred to as glacier runoff or simply runoff. The coupled atmosphere-glacier model was run over the time period September 2003 to September 2013 (Aas et al., 2016). The glacier model computes the climatic mass balance (CMB), i.e. the mass fluxes at the surface of the glacier, mainly due to deposition of snow during the accumulation season (typically October to May) and surface melt followed by runoff during the ablation season (typically June to September). The CMB model is implemented into the Weather Research and Forecasting model (WRF), which provides precipitation and other meteorological variables to the CMB model, required to compute the climatic mass balance, considering the surface energy balance. WRF is a mesoscale atmospheric model (Skamarock and Klemp, 2008). In Svalbard it has been applied to study boundary layer processes (Kilpelainen et al., 2011, 2012) and atmosphere-land interactions over both tundra (Aas et al., 2015) and glaciers (Claremar et al., 2012; Aas et al., 2016). Coupled model simulations were run over all of Svalbard at 3-km horizontal resolution using sea-surface temperature and sea ice concentration from the Operational Sea Surface Temperature and Sea Ice Analysis (OSTIA) and ERA-Interim climate reanalysis data as boundary conditions. Results were validated against field observations of meteorological conditions and in-situ measurements of snow accumulation and surface-mass balance across the archipelago (Aas et al., 2016).

For grid cells covered by glaciers, the land-surface scheme of WRF was replaced by a modified version of the CMB model of (Mölg et al., 2008, 2009), specifically adjusted for Arctic conditions (Aas et al., 2016). The model simulates the development of multi-year snowpacks and their transition into firn and ice. The CMB model employs meteorological variables generated by WRF, near-surface temperature, humidity, pressure, wind speed and incoming radiation to solve the surface energy balance and determine the energy available for melt. Solid precipitation along with surface and subsurface melt then yield the column-



specific mass balance over 17 layers down to 20 m depth. Variables are computed at a 20 seconds temporal resolution and are then aggregated into daily values.

Daily glacier runoff is determined as the difference between a production and a retention term of liquid water at or near the glacier surface. Production of liquid water is given as the sum of surface melt, internal melt and rain (liquid precipitation). Meltwater retention is the sum of internal refreezing within the snow and firn, superimposed ice formation, i.e. water refreezing on top of impermeable ice, and liquid water storage or more precisely, the change in liquid water content. Meltwater production is highest at lower glacier elevation, but not restricted to the ablation area. At higher elevation within the accumulation area, locally produced meltwater may be stored in the snow and firn column, thus reducing or preventing runoff. Runoff from each region is first computed in absolute terms (Gt; Fig. 1b), and then normalized by the associated area of the sea (km<sup>2</sup>), up to a defined distance from the coast (10, 20 or 50 km). This yield specific runoff received by the sea in terms of mm water equivalents (*RUNOFF*, in mm w.e.), i.e. the same units as used for expressing precipitation amounts or specific glacier mass balance. Note that our CMB model does not include a scheme for transport and routing of meltwater. The exact location of meltwater input to the fjords and ocean is therefore unknown. However, this does not compromise our regional-scale analysis, where all glacier runoff generated within a primary hydrological region, drains into the same associated fjord system or adjacent sea.

Mean specific climatic net mass balance of Svalbard glaciers for the period 2003–2013 was negative, -257 mm w.e. yr<sup>-1</sup>, which corresponds to a mean annual mass loss of about 8.7 Gt (Aas et al., 2016). Interannual variability in climatic mass balance is large, and dominated by a high variability in summer ablation. This is closely reflected in the annual cumulative runoff curves for the various hydrological regions (Fig. 1b). Regional glacier runoff is a function of the total regional glacier area and regional specific ablation. On average, Svalbard-wide specific glacier ablation and thus total annual glacier runoff amounted to 919 mm w.e. and 31.2 Gt, respectively, with a minimum in summer 2008 (673 mm w.e.; 22.9 Gt) and a maximum in summer 2013 (1508 mm w.e.; 51.3 Gt).

### 3.2 Ocean data

Chlorophyll *a* concentration (*CHL*, in mg m<sup>-3</sup>) in near-surface waters was quantified using satellite data from the European Space Agency (ESA) Ocean Colour Climate Change Initiative (CCI). We used Arctic reprocessed version L3 data obtained from the Copernicus Marine Environment Monitoring Service (CMEMS), providing 8-day means of merged, bias-corrected remote sensing reflectance at 1-km resolution from 1998 to 2014 (<http://marine.copernicus.eu>). This product merges reflectance data from SeaWiFS, MODIS-Aqua and MERIS sensors by realigning the spectra to that of the SeaWiFS sensor. Chlorophyll *a* is estimated from the OC5ci algorithm, which is a combination of two ocean colour algorithm for chlorophyll retrieval. The first is developed for clear waters in the open ocean, where ocean colour is dominated by chlorophyll *a*, i.e. the green pigment contained in phytoplankton biomass (case-1 waters; CI; Hu et al. (2012); Sathyendranath et al. (2012)). The second is optimized for optically complex coastal waters, influenced by terrestrial runoff and hence suspended sediments and coloured dissolved organic matter (case-2 waters; OC5; Gohin et al. (2008)). For Svalbard, chlorophyll *a* observations are typically limited to late March to early September, each year.



As key environmental variables other than *RUNOFF* we considered sea surface temperature (*SST*, in °C), mixed-layer depth, a measure of stratification (*MLD*, in m), and sea ice fraction (*SIF*, [0 1]). Daily means of these variables at 12.5 km resolution for years 1998–2014 were extracted from the TOPAZ4 Arctic Ocean Physics Reanalysis (version V0.3) obtained from CMEMS. The TOPAZ4 reanalysis uses the Hybrid Coordinate Ocean Model (HYCOM), an operational general ocean-circulation model that assimilates remotely sensed sea level anomalies, sea surface temperature, sea ice concentration, lagrangian sea ice velocities (winter only, since 2002), as well as temperature and salinity profiles from Argo floats using a 100-members deterministic version of the Ensemble Kalman filter (Xie et al., 2017).

### 3.3 Statistical analysis

All data (*CHL*, *RUNOFF*, *SST*, *MLD*, *SIF*) were first aggregated into regional time-series with the same 8-day temporal resolution as *CHL*. For each of the 14 hydrological regions (plus one sub-region), we constructed three time-series of different spatial scale and near-shore influence: 0–10 km, 10–20 km and 20–50 km distance from land. Main emphasis is on 0–10 km from land, as this covers the major fjord systems where we expect largest potential *RUNOFF* effects.

To test if associations between *RUNOFF* and *CHL* were statistically significant we restricted the data to late summer (June 13 to October 15, i.e. annual 8-day periods 21 to 36). This period includes the main glacier summer-melt period (mid-June to September) and is expected to start after termination of the phytoplankton spring bloom. For each region and spatial scale we considered the following generic model:

$$\log(CHL_{r,t}) = \alpha_r + \beta_r \cdot \log(CHL_{r,t-1}) + \mathbf{c}_r \cdot \mathbf{e}_{r,t} + \varepsilon_{r,t} \quad (1)$$

Here  $\log(CHL_{r,t})$  is the natural logarithm of *CHL* in region *r* (and a given distance interval from land) at time *t*,  $\alpha_r$  is the intercept,  $\beta_r$  is the auto-regressive effect of *CHL* in the previous time step,  $\mathbf{c}_r$  is a row vector with coefficients for environmental effects,  $\mathbf{e}_{r,t}$  is a column vector with the environmental covariate values,  $\varepsilon_{r,t}$  is a normal and independently distributed error term with variance  $\sigma_r^2/n_{r,t}$  and  $n_{r,t}$  is the number of *CHL* observations that were averaged to calculate  $CHL_{r,t}$ . By weighting the error variance with sample size, region-time combinations with few *CHL* observations, e.g., due to cloud cover, have less influence on results than region-time combinations with many observations.

To determine which environmental variables to include for each region, we used a two-step approach. We first found the best model without *RUNOFF*, using data for all years 1998–2014 (whereas *RUNOFF* was only available from September 2003 to September 2013). Variables were selected by step-wise adding terms if leading to lower value of the Akaike Information Criterion corrected for small sample size,  $AIC_C$  (Hurvich and Tsai, 1989). The  $AIC_C$  helps to find the best trade-off between the goodness-of-fit of a model and the simplicity of the model; a model with lower  $AIC_C$  is preferred over a model with higher  $AIC_C$ . Terms only marginally significant ( $P > 0.05$ ) were removed from the model. Nine candidate variables were considered at this step: (1)  $SST_{r,t}$ , (2)  $SST_{r,t-1}$ , (3)  $SST_{r,t} - SST_{r,t-1}$ , (4)  $\log(MLD_{r,t})$ , (5)  $\log(MLD_{r,t-1})$ , (6)  $\log(MLD_{r,t}) - \log(MLD_{r,t-1})$ , (7)  $SIF_{r,t}$ , (8)  $SIF_{r,t-1}$  and (9)  $SIF_{r,t} - SIF_{r,t-1}$ . The difference variables for *SST* and *MLD* were included as possible indicators of mixing of deeper nutrient-rich water masses into the surface layer. We then added *RUNOFF* and



$RUNOFF_{t-1}$  to the model selected in the first step, but only if leading to lower  $AIC_C$  (for the reduced period with  $RUNOFF$  data) and only if the association was significant at  $P < 0.05$ .

To assess if key model assumptions were met, we checked if residuals were independent and approximately normal distributed. Specifically, Pearson residuals (i.e., residuals standardized to unit standard deviation) from the final model for each region were explored for independence by plotting the autocorrelation function and the partial autocorrelation function and for approximate normality by plotting quantile-quantile normal plots. The final model for each region was uncorrelated in time and approximately normal distributed with a possible exception of region 22 in the analysis for 0–10 km from coast, which showed indications of unequal variance. We also checked if results were strongly influenced by a few outlying observations. Outliers were identified as residuals more than  $3.3 \times$  standard deviations away from zero, which is expected to occur by chance for 1 out of 1000 normal distributed cases, i.e. for about 2–3 of the  $>2000$  observations analysed. If outliers were identified, we refitted the model with the outliers removed and report significant changes in results, but kept the outliers in the presented model. 13 residuals distributed among 10 regions were identified as outliers in the analysis for 0–10 km from coast, and similar number for other distances from coast. Removing these outliers had little influence on parameter estimates for  $RUNOFF$  effects (all the coefficients remained statistically significant at  $P < 0.05$ ). All statistical analyses were performed using the R programming environment (R Core Team 2016).

## 4 Results

We first present regional associations of  $CHL$  with glacier runoff (Sec. 4.1), before moving on to associations with physical-ocean and sea ice variables (Sec. 4.2). Interpretation of these results will be discussed in the following section (Sec. 5).

Our statistical model identifies the environmental variables that best explain the observed regional summertime  $CHL$  (Fig. 2; Figs. A1–A3). The model considers instantaneous and delayed associations of  $CHL$  with a set of predictor variables, based on variable values during the current and previous 8-day time step, respectively. In addition, the model inspects associations of  $CHL$  with the rate of change of selected environmental variables. Note that the associations that we hereafter discuss are partial effects, i.e. the association of  $CHL$  with each predictor variable, while accounting for all other predictor variables selected in the model. As a model control run, we test the auto-correlation of  $CHL$  in the current and previous time step. The model reveals significant positive association in all regions and regardless of distance from the coast, as expected (Fig. 2a; Figs. A1–A3). In other words, if there is high  $CHL$  in the previous 8-day time step, then it is likely that  $CHL$  will also be high in the present time step.

### 4.1 Association of summertime chlorophyll $a$ with glacier runoff

We find significant positive association of  $CHL$  with  $RUNOFF$  in half of the primary hydrological regions (7 out of 14), namely East Spitsbergen (Region 11), Southern Spitsbergen (12), Van Mijen- and Van Keulenfjorden (13), Isfjorden (14), Wijde- and Woodfjorden (16), and Wahlenbergfjorden (22), in Nordaustlandet and Edgeøya (31) in South East Svalbard (Fig. 2; Figs. A1). A positive association also exist for the subregion of Kongsfjorden/Krossfjorden (155), whereas no significant association



exists for NW Spitsbergen (15) as a whole. Positive associations are mainly restricted to within 10-km distance from the coast, indicating that the *RUNOFF* effect on *CHL* is mainly limited to within the fjords. Fjords in Svalbard have a maximum width of typically less than 20 km and are thus entirely covered by this range. Beyond 10-km distance from the coast, as well as for regions characterised by open coastal conditions, significant positive association of *CHL* with *RUNOFF* vanishes (Fig. 2b; Figs. A2, A3). At 10–20 km, there is no significant association, while at 20–50 km there is a weak negative association for Southern Spitsbergen (12) and a weak positive association for East Spitsbergen (11) and Barentsøya (41). The latter regions all border Storfjorden, which forms a large, 40–80 km wide embayment between Eastern Spitsbergen to the West and Barentsøya and Edgeøya to the East. There are only a few delayed association of *CHL* with *RUNOFF* (Fig. 2c). For Edgeøya (31) a positive association is present at 10–50 km, in addition to the instantaneous response within 10-km distance from the coast (Fig. 2b). For neighbouring Barentsøya (41) a weak positive association exists for 10–20 km zone. *CHL* shows a negative delayed association with *RUNOFF* at 0–10 km for Wijdefjorden (16) and within 20–50 km off NE Nordaustlandet (25).

The primary hydrological regions have highly variable glacier coverage, ranging from 34.5% for Isfjorden in central Spitsbergen to 90.3% for SE Austfonna on Nordaustlandet (Tab. 1). Glacier characteristics in terms of glacier coverage, glacier area drained by tidewater glaciers, and total calving front length are on average  $\sim 10\%$  smaller for primary hydrological regions which display *RUNOFF* effects on *CHL* compared to those which do not. Mean specific-runoff rates per marine area within 10 km distance from the coast, range from 4.2 mm w.e. 8-days<sup>-1</sup> for Barentsøya to 24.2 mm w.e. 8-days<sup>-1</sup> for Kongsfjorden-Krossfjorden (Tab. 1). Despite the slightly smaller average glacier coverage, regions with *RUNOFF* effect on *CHL* have higher specific runoff rates that exceed those in the other regions by 46% and 69%, for mean specific runoff rates over ten subsequent summers from 2004 to 2013 and specific mean-annual-peak runoff rates, respectively. Our statistical model suggests that an increase in specific runoff of 10 mm w.e. 8-days<sup>-1</sup> raises summertime chlorophyll *a* concentrations in these regions by 5.2% to 20.0%, or 9.3% on average, with a standard deviation of 4.6% (Tab. 1). During the annual peak discharge we estimate that runoff increases chlorophyll *a* by 13.1% to 50.2% or  $28.4 \pm 13.5\%$  on average, compared to situations with no runoff.

## 4.2 Association of summertime chlorophyll *a* with physical ocean and sea ice variables

There are both negative and positive associations with *CHL* and any of the physical ocean and sea ice variables, although only for a limited number of regions. Concerning sea ice variables, the current sea ice fraction (*SIF*) has little association with *CHL* (Fig. 2d). However, there is a delayed positive association of *CHL* with *SIF* in northern Svalbard, mainly within 10 km from the coast (regions 15, 16, 23; Fig. 2e), but also 10–20 km (16) and 20–50 km (21), while *CHL* is negatively associated with a change in *SIF* at 0–10 km and 10–20 km (regions 12, 15, 17, 21, 24, 31, 41; Fig. 2f).

Moving on to sea-surface temperature (*SST*), current *SST* has a few positive associations at 20–50 km distance from the shore (regions 12, 14 and 17) and negative association north of Nordaustlandet at 0–10 and 10–20 km distance from the coast (24, 25; Fig. 2g). There is a positive delayed association of *CHL* and *SST* along the entire west coast of Spitsbergen at 0–10 and/or 10–20 km distance from the coast (12,13,14,15; Fig. 2h), as well as in Hinlopen straight off Northeast Spitsbergen (17). There is a negative instantaneous association of *CHL* with *SST* north of Nordaustlandet (25). The association of *CHL* with a



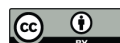

change in *SST* is negative all around Edgeøya (31) and Barentsøya (41), as well as western Nordaustlandet (23) and weakly positive in the outer region of NE Spitsbergen (17), at 20–50 km distance from the coast (Fig. 2i).

Mixed-layer depth shows some positive association with *CHL* at the outer regions along the west coast of Spitsbergen (13, 14, 15) and Hinlopen (17; Fig. 2j). The delayed association between *CHL* and *MLD* is negative in two northern regions (16, 21) within 10-km from the coast and positive at 10–20 and 20–50 km for Isfjorden (14) and E Spitsbergen (11), respectively (Fig. 2k). The change in *MLD* has a few both positive and negative associations (Fig. 2l).

## 5 Discussion

We first discuss the observed associations of summertime *CHL* with any of the environmental variables and provide physical and biological explanations. We start with the associations of summertime *CHL* with *RUNOFF* (Sec. 5.1), before moving on to ocean and sea ice variables which point at the effect of persistent sea ice coverage, and the influence of the West Spitsbergen Current (Sec. 5.2). We then describe the seasonal evolution of chlorophyll *a* in relation to environmental variables (Sec. 5.3). Finally, we discuss challenges related to the use of remotely sensed chlorophyll *a* as a proxy of phytoplankton biomass (Sec. 5.4).

### 5.1 Glacier runoff effects on marine primary production

Our study suggests that the overall effect of glacier runoff on marine primary production is positive for 7 out of 14 hydrological regions, including the major fjord-systems in Svalbard. We find that regions that display significant positive associations between *CHL* and *RUNOFF* have a 26% higher mean summertime chlorophyll *a*, and a 19% higher mean annual maximum chlorophyll *a*, than regions without such association (Tab. 1). Regions which display a positive association between *CHL* and *RUNOFF* are characterized by a highly variable fraction of tidewater-glacier drained area, ranging from 40.2% for Isfjorden to 87.4% for Southern Spitsbergen, with a regional mean of  $62.3 \pm 21.0\%$ . This is slightly less, than the corresponding mean value of  $66.4 \pm 21.0\%$  in the other regions.

Field observations across the Arctic show that glacial fjords dominated by tidewater glaciers have generally higher productivity than those dominated by land-terminating glaciers (Hopwood et al., 2020). Marine terminating glaciers are generally thought to enhance marine primary production, while land-terminating glaciers are thought to obstruct it (Meire et al., 2017). Consequently, one might expect that regions with a high fraction of tidewater glaciers yield significant positive associations between *CHL* and *RUNOFF*, whereas regions with a low fraction of tidewater glaciers, yield weaker positive, or potentially negative associations. However, we do not find a clear relationship between the fraction of tidewater glaciers and the sign or strength of associations between *CHL* and *RUNOFF* (Tab. 1). This indicates that a fraction of tidewater glaciers above  $\sim 40\%$  is sufficient to provide upwelling of subglacial discharge plumes capable of stimulating regional-scale marine primary production. Alternatively, other mechanisms by which glacier runoff stimulates marine primary productivity may play a role.

While our method allows us to assess the overall effect of glacier runoff on regional-scale phytoplankton dynamics, it does not reveal the very mechanism(s), by which the effect is achieved. We suggest that the positive association between *CHL* and

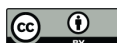

*RUNOFF* could be explained by the several processes, which may act independently or in combination, dependent on regional characteristics: (1) buoyant upwelling of subglacial discharge plumes at the calving front of tidewater glaciers (a few tidewater glaciers may be sufficient to fuel primary production in the entire fjord system); (2) glacier runoff may enhance the general estuarine circulation; and (3) glacier runoff provides a direct source of limiting nutrients. The first two points are considered indirect effects and the third a direct effect of glacier runoff on marine primary production.

Considering the first mechanism, buoyant upwelling of subglacial discharge plumes is associated with the entrainment of large volumes of ambient sea-water from deep to intermediate depth. This process is considered to deliver significant quantities of nutrients to surface waters (Svendsen et al., 2002; Meire et al., 2017; Kanna et al., 2018; Hopwood et al., 2018). These nutrients are first expected to enhance primary productions some distance away from the glacier front, where light conditions become more favorable as progressively more suspended particles have settled deeper into the water column (Etherington et al., 2007; Halbach et al., 2019; Hopwood et al., 2020). Glacier erosion rates, the amount and size of suspended particles and thus glacier runoff effects on light regime is controlled by the glacier bedrock lithology as well as subglacial drainage-system configuration and total discharge (Halbach et al., 2019). Glaciers in Svalbard are grounded at shallow depth compared to glaciers in Greenland. Entrainment factors are therefore expected to be significantly smaller for Svalbard than for Greenland, as they scale with the depth at which subglacial discharge enters the water column (Hopwood et al., 2020). Nevertheless, Halbach et al. (2019) found nutrient upwelling in Kongsfjorden to be significant source of nutrients to the euphotic zone, as comparably small discharge volumes were sufficient for the plume to reach the surface (Slater et al., 2017) and plumes were present for a long timeperiod during summer (How et al., 2017). In addition, upwelling of ammonium released from the shallow seafloor of Kongsfjorden was found to be a significant source of bioavailable nitrate (Halbach et al., 2019).

The second mechanism concerns the estuarine circulation, driven by down-fjord katabatic winds, which facilitate the export of relatively fresh or ‘brackish’ surface waters out of the fjord (e.g., Svendsen et al., 2002). This outflow of surface waters will induce a compensating return flow of warm and saline water masses from the shelf area at intermediate depth (Svendsen et al., 2002; Cottier et al., 2010). Sundfjord et al. (2017) used a high resolution ocean-circulation model, forced with glacial freshwater discharge to simulate water exchange in Kongsfjorden, Svalbard. Simulations revealed that glacial freshwater discharge drives a strong outflow in the upper surface layer and a significant compensating inflow of Atlantic water in the upper 15–20 m, which was enhanced in times of peak discharge. The volume flux was strongly influenced by the local wind field. Vertical mixing by wind stress and tidal forcing provides a mechanism of bringing nutrients from intermediate water into the euphotic zone where they become available for phytoplankton, fueling primary production. Svalbard fjords are considered broad fjords, where rotational ‘Coriolis’ effects play a role (Svendsen et al., 2002; Cottier et al., 2010). These rotational dynamics may contribute to vertical mixing of surface and intermediate depth waters, thereby enhancing the effect of the general estuarine circulation on nutrient availability in surface waters.

The third candidate mechanism concerns the direct fertilization of seas by nutrients contained in glacier runoff. In light of the reported low concentrations of nutrient in glacier meltwater, compared to ambient seawater (Halbach et al., 2019; Hopwood et al., 2020), we believe that indirect effects dominate over direct effects. While recent studies have focused primarily on

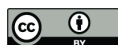

the role of subglacial discharge plumes, we cannot exclude that also the enhancement of the general estuarine circulation contributes to the observed positive effect of glacier runoff on marine primary productivity.

## 5.2 The role of ocean and sea ice variables on summertime *CHL*

### 390 5.2.1 Late spring bloom in northern Svalbard

The northern regions of Svalbard show a positive delayed association of *CHL* with *SIF* (Fig. 2e). This suggests high *CHL* in response to previously high *SIF*. The exact timing and breakup of sea ice is highly variable. It depends not only on the initial sea ice extent, thickness and stability, but also wind conditions and wave action, as well as sea ice conditions further offshore (Cottier et al., 2010). In northern Svalbard, oceanic pack ice can prevent sea ice from being exported out of the fjord, thus  
 395 extending the sea ice season (Cottier et al., 2010). This is expected to lead to a significant delay of the phytoplankton spring bloom. Presence of sea ice in the previous 8-day time period in the summer months in this region is thus an indication of hydrological spring conditions. This interpretation of a late spring bloom is supported by a negative association of *CHL* with changes in *SIF*, meaning that chlorophyll *a* is increasing when sea ice coverage is decreasing (Fig. 2f). The latter association is, however, not restricted to northern Svalbard, but significant also for other regions in Svalbard.

### 400 5.2.2 Advection of water masses of Atlantic origin

Similar as for the sea ice variables, we found delayed associations of *CHL* with *SST* and with changes in *SST*. A delayed positive association with *SST* is revealed along the entire west coast of Spitsbergen (Fig. 2h). This may indicate the influence of the WSC, flowing along the West Spitsbergen shelf and spilling onto the shelf. Note that the 50-km offshore-distance aligns approximately with the shelf edge along the western and northern side of Spitsbergen, indicating that variations in overflow of  
 405 the West Spitsbergen current may affect the outer region (20–50 km). High *SST* points at the advection of warm Atlantic water, which is also characterized by high salinity and nutrient content, thus capable of enhancing primary production and hence, *CHL*. The importance of warm saline Atlantic water for fjord and shelf water masses and the marine ecosystem was previously reported by Hegseth and Tverberg (2013) and Nilsen et al. (2016).

Around Edgeøya, a strong negative association of *CHL* with a change in *SST* coincides with the positive association of *CHL*  
 410 with *RUNOFF* (Fig. 2i,c). Cooling *SST* may be associated with meltwater spreading out on the surface away from the coast, meaning that the association of *CHL* with this variable and *RUNOFF* may reflect the same process. The negative association of *CHL* with change in *SST* might also be caused by increased stratification and nutrient limitation due to solar heating.

Vertical mixing is closely linked with the mixed-layer depth (*MLD*). The generally positive associations between *MLD* and *CHL* along the west coast is possibly caused by advection of Atlantic water onto the shelf, leading to increased vertical mixing  
 415 as evident in a deepening of the *MLD*. Vertical mixing increases the supply of essential nutrients to surface water layers, thereby increasing primary production as indicated by high *CHL* (Fig. 2j). A deepening of the *MLD* caused by winds could have the same effect, when nutrients in the euphotic zone have been depleted in summer. In a spring situation when nutrients are plentiful, deep vertical mixing and high *MLD* are, however, likely to reduce the build-up of *CHL*, as the phytoplankton



multiply more slowly because they get access to less light (Sakshaug et al., 2009). Deepening of *MLD* can also have a dilution  
 420 effect on near-surface phytoplankton biomass (e.g. Behrenfeld and Boss, 2014). These phenomena could explain the negative  
 associations between *MLD* and *CHL* in some northern regions.

### 5.3 Phytoplankton dynamics during the productive season

Our timeseries of chlorophyll *a*, glacier runoff, as well as physical ocean and sea ice variables allows us to put the summer  
 bloom into a larger temporal context. We will discuss phytoplankton dynamics in Svalbard over the entire productive season,  
 425 which lasts from about April to September, and compare our findings to those from other regions. Investigating fjords in SW  
 Greenland, Juul-Pedersen et al. (2015) were able to divide the productive season into three distinct phases: the spring bloom  
 (April/May; phase 1), a transition period with low primary production (June; phase 2) and the summer bloom (July–August,  
 phase 3).

To investigate whether these three phases can be identified in Svalbard, we average monthly means of all relevant variables  
 430 over the period 2003–2013 (Fig. 3). The spring bloom typically occurs in May (Fig. 3a), coincident with increased solar  
 insolation, sea ice breakup (Fig. 3c) and initialization of a weak stratification, in line with phase 1 of Juul-Pedersen et al. (2015).  
 Stratification (shallow *MLD*; Fig. 3e) seems to be dominated by solar heating (increasing *SST*; Fig. 3d). Significant runoff starts  
 in June, when stratification is already established (Fig. 3b,e), but *CHL* has declined from its spring-bloom value, indicative of  
 nutrients depletion (Phase-2 in Juul-Pedersen et al. (2015)). Runoff during the later summer, i.e. July and August, coincides  
 435 with a second period of high *CHL* (Phase-3; Fig. 3a,b), in some cases exceeding the monthly mean values during spring bloom.  
 Note that the spring bloom typically only lasts for a short time, i.e. one 8-day period, during which concentrations can be  
 several times larger than what is reflected in the monthly mean. Peak values of *CHL* during summer may be lower, but more  
 persistent, resulting in monthly mean values similar or larger than those during spring time. For regions that show a positive  
 association between *CHL* and *RUNOFF* (e.g. regions 11, 12, 13, 14, 16), monthly mean *CHL* during summer (July–August)  
 440 typically match or exceed that during spring bloom (May), with a minimum in June, in line with phytoplankton dynamics  
 described by Juul-Pedersen et al. (2015).

In NE Svalbard and Nordaustlandet (regions 17, 21–24), the 10-year monthly mean *SIF* is around 40–50% in June and 20%  
 in July. Several regions in northern Svalbard showed a delayed association of *CHL* with *SIF* (regions 15, 16, 23; Fig. 2e) that  
 indicates a delayed spring bloom. In this case, two separate production phases cannot be distinguished, at least at monthly  
 445 temporal resolution. Instead, *CHL* during spring is low and steadily increases towards a maximum in July (e.g. regions 17,  
 21, 25). *MLD* during springtime (April) varies from up to 150 m in Western Spitsbergen to around 30 m in NE Svalbard and  
 typically shallows in late spring to early summer (May–June). The shallowing *MLD* coincides with rising *SST*, suggesting that  
 solar heating plays an important role in initiating stratification. Stable stratification of surface waters, as indicated by a shallow  
*MLD* is already established when significant glacier runoff starts in July. Generally lower *CHL* in June than May suggests that  
 450 phytoplankton may be nutrient limited when glacial melting sets in. The peak meltwater discharge coincides with elevated  
*CHL* during summer (July–August).



## 5.4 Challenges and uncertainties of satellite-based surface chlorophyll *a* products

Although remotely sensed chlorophyll *a* is a commonly used proxy of phytoplankton biomass, there are several limitations to this approach. Firstly, data sampling relies on sufficient daylight, clear skies and largely sea ice free conditions, as ocean colour sensors cannot detect ice-algae or phytoplankton cells beneath sea ice (Arrigo, 2014). For Svalbard, chlorophyll *a* observations are typically limited to late March to early September. In the beginning and end of the acquisition period, spatial sampling is generally poor, due to the persistence of sea ice and limited day light (low sun angles). Spatial sampling is also poor under cloudy conditions, typical for Svalbard during summertime. The variable sampling intensity was accounted for in the statistical analysis, as 8-day time periods and regions with many satellite observations of *CHL* were given more weight in the analysis than periods and regions with few observations. Secondly, although the algorithm used to estimate *CHL* from surface reflectance accounts for the possible presence of inorganic particles, bias from inorganic particles originating from glacial meltwater cannot be ruled out. Some fjords of Svalbard are heavily influenced by suspended sediments from terrestrial or subglacial runoff, which influences ocean colour significantly (e.g., Dowdeswell et al., 2015; How et al., 2017). Thirdly, sub-surface maxima of chlorophyll *a*, as may occur in summer situations, are easily missed by satellite sensors, because data retrieval is restricted to the upper layer of the water column down to the 1% photosynthetically available radiation (Lee et al., 2007). It should therefore be kept in mind that our results show what happens in near-surface layers, and not the entire water column. Furthermore, phytoplankton can rapidly respond to reduced light availability, for example due to suspended matter, by increasing the chlorophyll *a* concentrations in their cells (Finkel, 2001; Finkel et al., 2004). It is therefore uncertain whether possible increased chlorophyll *a* concentrations at high meltwater runoff also reflects increased phytoplankton biomass. Further verification of remotely sensed chlorophyll *a* as a proxy of phytoplankton biomass in complex Arctic waters is required to gain more confidence in the results from our statistical analysis. This can only be achieved by in-situ observations, extensive in both space and time, including simultaneous measurements of phytoplankton biomass, glacier runoff and nutrient concentrations in different water masses.

## 6 Conclusions

We investigated the effect of glacier runoff on regional-scale phytoplankton dynamics in Svalbard by combining chlorophyll *a* from satellite ocean colour with glacier mass-balance modelling. Statistical analysis of regional timeseries revealed significant positive association of *CHL* and *RUNOFF* for 7 out of 14 primary hydrological regions. Our results suggest that the overall effect of glacier runoff on marine primary production in these regions is positive, despite counter-acting effects of glacier runoff on the availability of light and essential nutrients, both of which are required for an increase in phytoplankton biomass. We find that regions that display significant positive associations between *CHL* and *RUNOFF* have a 26% higher mean summertime chlorophyll *a*, and a 19% higher mean annual maximum chlorophyll *a*, compared to regions without such association. Our analysis suggests that an increase in specific runoff of 10 mm w.e. 8-days<sup>-1</sup> raises summertime chlorophyll *a* concentrations by 5.2% to 20.0%, or 9.3% on average, with a standard deviation of 4.6%. During the annual peak discharge the effect is even larger, when 13.1% to 50.2% of the increase in chlorophyll *a*, or  $28.4 \pm 13.5\%$  on average, is associated with glacier runoff.



485 Glacier runoff thus facilitates a secondary phytoplankton bloom in July to August, typically following a spring bloom in May and a minimum in June, in line with in-situ observations from Greenland (e.g. Juul-Pedersen et al., 2015). In terms of monthly mean *CHL*, the magnitude of the summer bloom is similar or may even exceed that of the spring bloom.

Observations across the Arctic have shown that glacier fjords dominated by tidewater glaciers are typically more productive than those with only land-terminating glaciers (Meire et al., 2017; Hopwood et al., 2020). Here we find positive association  
 490 of *CHL* with *RUNOFF* regardless of a highly variable glacier coverage, ranging from 35.5% to 81.2%, as well as glacier area drained through tidewater glaciers, ranging from 40.2% to 87.4%. This indicates that upwelling-effects of nutrients from sub-glacial discharge plumes at a few tidewater glaciers may be sufficient to fuel regional-scale primary production. Alternatively, other mechanisms, such as enhanced estuarine circulation may play a role. Estuarine circulation relies on a relatively fresh surface layer which may originate from runoff of both land and marine-terminating glaciers and down-fjord wind, which are  
 495 typical for Svalbard fjords (Svendsen et al., 2002; Cottier et al., 2005; Sundfjord et al., 2017).

The association of regional-scale *CHL* with *RUNOFF* is typically restricted to the major fjord systems, and within 10-km distance from the coast. For regions characterized by open coastal conditions, and beyond 10-km distance from the coast, the relationship between glacier runoff and marine primary production vanishes. Since our statistical model also accounted for physical-ocean and sea ice variables, we are able to identify other factors which influence chlorophyll *a* in Svalbard during  
 500 summer. These factors include sea ice conditions, especially in northern Svalbard, pointing at the influence of persistent sea ice and late sea ice breakup. Furthermore, associations of *CHL* with *SST* and *MLD* along the West Spitsbergen shelf indicate the role of the West Spitsbergen Current, i.e. the advection of warm saline and nutrient-rich water masses of Atlantic origin.

To our knowledge, this study is the first to link large-scale chlorophyll *a* from satellite ocean colour, an indicator of phytoplankton biomass, with glacier runoff from glacier mass balance modeling. Our method can be applied on a regional to  
 505 pan-Arctic scale, thereby complementing valuable in-situ observations which are only available from a few sites and often of short duration, thus not capturing inter-seasonal to inter-annual variability.

*Data availability.* Chlorophyll *a* products, physical ocean variables, including sea surface temperature (*SST*) and sea ice fraction (*SIF*), are available through the Copernicus Marine Environment Monitoring Service (CMEMS; <http://marine.copernicus.eu>). Timeseries of simulated glacier meltwater runoff for primary hydrological regions in Svalbard are available at <https://doi.org/10.5281/zenodo.5115647>.

## 510 Appendix A: Partial effects of environmental variables on chlorophyll *a*

*Author contributions.* TD, LCS and KD designed the study. TD extracted regional timeseries of glacier runoff from CMB simulations for Svalbard ran by KSA. KD analysed datasets of chlorophyll *a*, physical ocean and sea ice variables. LCS ran the statistical model. TD designed main figures and LCS designed appendix figures. TD wrote the initial manuscript with contributions from co-authors on their respective methods. All authors discussed the results and commented on or edited the manuscript.





515 *Competing interests.* There are no competing interests.

*Acknowledgements.* This work was supported by the Nordforsk-funded GreenMAR project and benefitted from discussions during two cross-cutting activities on ‘Glacier-ocean interactions and their impact on Arctic marine ecosystems’ organized by the IASC Network on Arctic Glaciology in 2019 and 2020. LCS thanks the Research Council of Norway for support through the project The Nansen Legacy (RCN no. 276730) and KD thanks the China Scholarship Council. We also thank the Copernicus Marine Environment Monitoring Service  
520 for satellite and reanalysis data provided through their website.



## References

- Aas, K. S., Berntsen, T. K., Boike, J., Etzelmüller, B., Kristjánsson, J. E., Maturilli, M., Schuler, T. V., Stordal, F., and Westermann, S.: A Comparison between Simulated and Observed Surface Energy Balance at the Svalbard Archipelago, *Journal of Applied Meteorology and Climatology*, 54, 1102–1119, <https://doi.org/10.1175/JAMC-D-14-0080.1>, 2015.
- 525 Aas, K. S., Dunse, T., Collier, E., Schuler, T. V., Berntsen, T. K., Kohler, J., and Luks, B.: The climatic mass balance of Svalbard glaciers: a 10-year simulation with a coupled atmosphere–glacier mass balance model, *The Cryosphere*, 10, 1089–1104, <https://doi.org/10.5194/tc-10-1089-2016>, 2016.
- AMAP: Snow, Water, Ice and Permafrost in the Arctic (SWIPA) 2017, Tech. rep., Arctic Monitoring and Assessment Programme (AMAP), 2017.
- 530 Arendt, K. E., Agersted, M. D., Sej, M. K., and Juul-Pedersen, T.: Glacial meltwater influences on plankton community structure and the importance of top-down control (of primary production) in a NE Greenland fjord, *Estuarine Coastal and Shelf Science*, 183, 123–135, <https://doi.org/10.1016/j.ecss.2016.08.026>, 2016.
- Arrigo, K. R.: Sea Ice Ecosystems, *Annual Review of Marine Science*, Vol 6, 6, 439–467, <https://doi.org/10.1146/annurev-marine-010213-135103>, 2014.
- 535 Arrigo, K. R. and van Dijken, G. L.: Continued increases in Arctic Ocean primary production, *Progress in Oceanography*, 136, 60–70, <https://doi.org/10.1016/j.pocean.2015.05.002>, 2015.
- Arrigo, K. R., van Dijken, G. L., Castelao, R. M., Luo, H., Rennermalm, A. K., Tedesco, M., Mote, T. L., Oliver, H., and Yager, P. L.: Melting glaciers stimulate large summer phytoplankton blooms in southwest Greenland waters, *Geophysical Research Letters*, 44, 6278–6285, <https://doi.org/10.1002/2017GL073583>, 2017.
- 540 Bamber, J. L., Tedstone, A. J., King, M. D., Howat, I. M., Enderlin, E. M., van den Broeke, M. R., and Noel, B.: Land Ice Freshwater Budget of the Arctic and North Atlantic Oceans: 1. Data, Methods, and Results, *Journal of Geophysical Research: Oceans*, pp. n/a–n/a, <https://doi.org/10.1002/2017JC013605>, 2018.
- Behrenfeld, M. J. and Boss, E. S.: Resurrecting the Ecological Underpinnings of Ocean Plankton Blooms, *Annual Review of Marine Science*, 6, 167–194, <https://doi.org/10.1146/annurev-marine-052913-021325>, PMID: 24079309, 2014.
- 545 Bhatia, M. P., Kujawinski, E. B., Das, S. B., Breier, C. F., Henderson, P. B., and Charette, M. A.: Greenland meltwater as a significant and potentially bioavailable source of iron to the ocean, *Nature Geoscience*, 6, 274–278, <https://doi.org/10.1038/NGEO1746>, 2013.
- Calleja, M. L., Kerherve, P., Bourgeois, S., Kedra, M., Leynaert, A., Devred, E., Babin, M., and Morata, N.: Effects of increase glacier discharge on phytoplankton bloom dynamics and pelagic geochemistry in a high Arctic fjord, *Progress in Oceanography*, 159, 195–210, <https://doi.org/10.1016/j.pocean.2017.07.005>, 2017.
- 550 Carroll, D., Sutherland, D. A., Shroyer, E. L., Nash, J. D., Catania, G. A., and Stearns, L. A.: Subglacial discharge-driven renewal of tidewater glacier fjords, *Journal of Geophysical Research-oceans*, 122, 6611–6629, <https://doi.org/10.1002/2017JC012962>, 2017.
- Claremar, B., Obleitner, F., Reijmer, C., Pohjola, V., Waxegard, A., Karner, F., and Rutgersson, A.: Applying a Mesoscale Atmospheric Model to Svalbard Glaciers, *Advances In Meteorology*, p. 321649, <https://doi.org/10.1155/2012/321649>, 2012.
- Cottier, F., Tverberg, V., Inall, M., Svendsen, H., Nilsen, F., and Griffiths, C.: Water mass modification in an Arctic fjord through cross-shelf exchange: The seasonal hydrography of Kongsfjorden, Svalbard, *Journal of Geophysical Research-oceans*, 110, C12005, <https://doi.org/10.1029/2004JC002757>, 2005.



- Cottier, F. R., Nilsen, F., Inall, M. E., Gerland, S., Tverberg, V., and Svendsen, H.: Wintertime warming of an Arctic shelf in response to large-scale atmospheric circulation, *Geophysical Research Letters*, 34, n/a–n/a, <https://doi.org/10.1029/2007GL029948>, 110607, 2007.
- 560 Cottier, F. R., Nilsen, F., Skogseth, R., Tverberg, V., Skarðhamar, J., and Svendsen, H.: Arctic fjords: a review of the oceanographic environment and dominant physical processes, *Geological Society, London, Special Publications*, 344, 35–50, <https://doi.org/10.1144/SP344.4>, 2010.
- Dowdeswell, J. A., Hogan, K. A., Arnold, N. S., Mugford, R. I., Wells, M., Hirst, J. P. P., and Decalf, C.: Sediment-rich meltwater plumes and ice-proximal fans at the margins of modern and ancient tidewater glaciers: Observations and modelling, *Sedimentology*, 62, 1665–1692, <https://doi.org/10.1111/sed.12198>, 2015.
- 565 Dubnick, A., Kazemi, S., Sharp, M., Wadham, J., Hawkings, J., Beaton, A., and Lanoil, B.: Hydrological controls on glacially exported microbial assemblages, *Journal of Geophysical Research: Biogeosciences*, pp. n/a–n/a, <https://doi.org/10.1002/2016JG003685>, 2016JG003685, 2017.
- Etherington, L. L., Hooge, P. N., Hooge, E. R., and Hill, D. F.: Oceanography of Glacier Bay, Alaska: Implications for biological patterns in a glacial fjord estuary, *Estuaries and Coasts*, 30, 927–944, 2007.
- 570 Finkel, Z. V.: Light absorption and size scaling of light-limited metabolism in marine diatoms, *Limnology and Oceanography*, 46, 86–94, <https://doi.org/10.4319/lo.2001.46.1.0086>, 2001.
- Finkel, Z. V., Irwin, A. J., and Schofield, O.: Resource limitation alters the  $3/4$  size scaling of metabolic rates in phytoplankton, *Marine Ecology Progress Series*, 273, 269–279, <https://doi.org/10.3354/meps273269>, 2004.
- Gohin, F., Saulquin, B., Oger-Jeanneret, H., Lozac’h, L., Lampert, L., Lefebvre, A., Riou, P., and Bruchon, F.: Towards a better assessment of the ecological status of coastal waters using satellite-derived chlorophyll-a concentrations, *Remote Sensing of Environment*, 112, 3329–3340, <https://doi.org/10.1016/j.rse.2008.02.014>, earth Observations for Marine and Coastal Biodiversity and Ecosystems Special Issue, 2008.
- 575 Hagen, J.O., Liestøl, O., Roland, E., Jørgensen, and T.: *Glacier Atlas of Svalbard and Jan Mayen*, Norsk Polarinstitutt, Oslo and Norway, 1993.
- 580 Halbach, L., Vihtakari, M., Duarte, P., Everett, A., Granskog, M. A., Hop, H., Kauko, H. M., Kristiansen, S., Myhre, P. I., Pavlov, A. K., Pramanik, A., Tatarek, A., Torsvik, T., Wiktor, J. M., Wold, A., Wulff, A., Steen, H., and Assmy, P.: Tidewater Glaciers and Bedrock Characteristics Control the Phytoplankton Growth Environment in a Fjord in the Arctic, *Frontiers in Marine Science*, 6, UNSP 254, <https://doi.org/10.3389/fmars.2019.00254>, 2019.
- Hanssen-Bauer, I., Førland, E. J., Hisdal, H., Mayer, S. Sandø, A., and Sorteberg, A.: Climate in Svalbard 2100, Tech. rep., The Norwegian Centre for Climate Services (NCCS), <http://www.miljodirektoratet.no/no/Publikasjoner/2019/Februar/Climate-in-Svalbard-2100--a-knowledge-base-for-climate-adaptation/>, 2019.
- 585 Hawkings, J., Wadham, J., Tranter, M., Lawson, E., Sole, A., Cowton, T., Tedstone, A., Bartholomew, I., Nienow, P., Chandler, D., and Telling, J.: The effect of warming climate on nutrient and solute export from the Greenland Ice Sheet, *Geochemical Perspectives Letters*, 1, 94–104, <http://www.geochemicalperspectivesletters.org/article1510>, 2015.
- 590 Hegseth, E. N. and Tverberg, V.: Effect of Atlantic water inflow on timing of the phytoplankton spring bloom in a high Arctic fjord (Kongsfjorden, Svalbard), *Journal of Marine Systems*, 113, 94 – 105, <https://doi.org/10.1016/j.jmarsys.2013.01.003>, 2013.
- Hegseth, E. N., Assmy, P., Wiktor, J. M., Wiktor, J., Kristiansen, S., Leu, E., Tverberg, V., Gabrielsen, T. M., Skogseth, R., and Cottier, F.: Phytoplankton Seasonal Dynamics in Kongsfjorden, Svalbard and the Adjacent Shelf, pp. 173–227, Springer International Publishing, Cham, [https://doi.org/10.1007/978-3-319-46425-1\\_6](https://doi.org/10.1007/978-3-319-46425-1_6), 2019.



- 595 Hodson, A. J., Mumford, P. N., Kohler, J., and Wynn, P. M.: The High Arctic glacial ecosystem: new insights from nutrient budgets, *Biogeochemistry*, 72, 233–256, <https://doi.org/10.1007/s10533-004-0362-0>, 2005.
- Hopwood, M. J., Connelly, D. P., Arendt, K. E., Juul-Pedersen, T., Stinchcombe, M. C., Meire, L., Esposito, M., and Krishna, R.: Seasonal Changes in Fe along a Glaciated Greenlandic Fjord, *Frontiers In Earth Science*, 4, UNSP 15, <https://doi.org/10.3389/feart.2016.00015>, 2016.
- 600 Hopwood, M. J., Carroll, D., Browning, T. J., Meire, L., Mortensen, J., Krisch, S., and Achterberg, E. P.: Non-linear response of summertime marine productivity to increased meltwater discharge around Greenland, *Nature Communications*, 9, 3256, <https://doi.org/10.1038/s41467-018-05488-8>, 2018.
- Hopwood, M. J., Carroll, D., Dunse, T., Hodson, A., Holding, J. M., Iriarte, J. L., Ribeiro, S., Achterberg, E. P., Cantoni, C., Carlson, D. F., Chierici, M., Clarke, J. S., Cozzi, S., Fransson, A., Juul-Pedersen, T., Winding, M. H. S., and Meire, L.: Review article: How does glacier discharge affect marine biogeochemistry and primary production in the Arctic?, *The Cryosphere*, 14, 1347–1383, <https://doi.org/10.5194/tc-14-1347-2020>, 2020.
- 605 How, P., Benn, D. I., Hulton, N. R. J., Hubbard, B., Luckman, A., Sevestre, H., van Pelt, W. J. J., Lindback, K., Kohler, J., and Boot, W.: Rapidly changing subglacial hydrological pathways at a tidewater glacier revealed through simultaneous observations of water pressure, supraglacial lakes, meltwater plumes and surface velocities, *Cryosphere*, 11, 2691–2710, <https://doi.org/10.5194/tc-11-2691-2017>, 2017.
- 610 Hu, C., Lee, Z., and Franz, B.: Chlorophyll algorithms for oligotrophic oceans: A novel approach based on three-band reflectance difference, *Journal of Geophysical Research: Oceans*, 117, n/a–n/a, <https://doi.org/10.1029/2011JC007395>, c01011, 2012.
- Hugonnet, R., McNabb, R., Berthier, E., Menounos, B., Nuth, C., Girod, L., Farinotti, D., Huss, M., Dussaillant, I., Brun, F., and K"ab, A.: Accelerated global glacier mass loss in the early twenty-first century, *Nature*, 592, 726–731, <https://doi.org/10.1038/s41586-021-03436-z>, 2021.
- 615 Hurvich, C. and Tsai, C.: Regression and Time-series Model Selection in Small Samples, *Biometrika*, 76, 297–307, <https://doi.org/10.2307/2336663>, 1989.
- IMBIE Team: Mass balance of the Greenland Ice Sheet from 1992 to 2018, *Nature*, <https://doi.org/10.1038/s41586-019-1855-2>, 2019.
- IPCC, 2019: Pörtner, H.-O., Roberts, D. C., Masson-Delmotte, V., Zhai, P., Tignor, M., Poloczanska, E., Mintenbeck, K., Nicolai, M., Okem, A., Petzold, J., Rama, B., and Weyer, N.: IPCC Special Report on the Ocean and Cryosphere in a Changing Climate, Tech. rep., The Intergovernmental Panel on Climate Change (IPCC), <https://www.ipcc.ch/srocc/home/>, In press.
- 620 Isaksen, K., Nordli, O., Forland, E. J., Lupikasza, E., Eastwood, S., and Niedzwiedz, T.: Recent warming on Spitsbergen-Influence of atmospheric circulation and sea ice cover, *Journal of Geophysical Research-atmospheres*, 121, 11 913–11 931, <https://doi.org/10.1002/2016JD025606>, 2016.
- Juul-Pedersen, T., Arendt, K. E., Mortensen, J., Blicher, M. E., Sogaard, D. H., and Rysgaard, S.: Seasonal and interannual phytoplankton production in a sub-Arctic tidewater outlet glacier fjord, SW Greenland, *Marine Ecology Progress Series*, 524, 27–38, <https://doi.org/10.3354/meps11174>, 2015.
- 625 Kahru, M., Kudela, R. M., Anderson, C. R., Manzano-Sarabia, M., and Mitchell, B. G.: Evaluation of Satellite Retrievals of Ocean Chlorophyll-a in the California Current, *Remote Sensing*, 6, 8524–8540, <https://doi.org/10.3390/rs6098524>, 2014.
- Kanna, N., Sugiyama, S., Ohashi, Y., Sakakibara, D., Fukamachi, Y., and Nomura, D.: Upwelling of Macronutrients and Dissolved Inorganic Carbon by a Subglacial Freshwater Driven Plume in Bowdoin Fjord, Northwestern Greenland, *Journal of Geophysical Research: Biogeosciences*, 123, 1666–1682, <https://doi.org/10.1029/2017JG004248>, 2018.
- 630



- Kilpelainen, T., Vihma, T., and Olafsson, H.: Modelling of spatial variability and topographic effects over Arctic fjords in Svalbard, *Tellus Series A-dynamic Meteorology and Oceanography*, 63, 223–237, <https://doi.org/10.1111/j.1600-0870.2010.00481.x>, 2011.
- Kilpelainen, T., Vihma, T., Manninen, M., Sjoblom, A., Jakobson, E., Palo, T., and Maturilli, M.: Modelling the vertical structure of the  
 635 atmospheric boundary layer over Arctic fjords in Svalbard, *Quarterly Journal of the Royal Meteorological Society*, 138, 1867–1883, <https://doi.org/10.1002/qj.1914>, 2012.
- König, M., Nuth, C., Kohler, J., Moholdt, G., and Pettersen, R.: A digital glacier database for svalbard, pp. 229–239, Springer Berlin Heidelberg, Berlin, Heidelberg, [https://doi.org/10.1007/978-3-540-79818-7\\_10](https://doi.org/10.1007/978-3-540-79818-7_10), 2014.
- Lee, Y., Matrai, P. A., Friedrichs, M. A. M., Saba, V. S., Antoine, D., Ardyna, M., Asanuma, I., Babin, M., Belanger, S., Benoit-Gagne,  
 640 M., Devred, E., Fernandez-Mendez, M., Gentili, B., Hirawake, T., Kang, S. H., Kameda, T., Katlein, C., Lee, S. H., Lee, Z. P., Melin, F., Scardi, M., Smyth, T. J., Tang, S., Turpie, K. R., Waters, K. J., and Westberry, T. K.: An assessment of phytoplankton primary productivity in the Arctic Ocean from satellite ocean color/chlorophyll-a based models, *Journal of Geophysical Research-oceans*, 120, 6508–6541, <https://doi.org/10.1002/2015JC011018>, 2015.
- Lee, Z., Weidemann, A., Kindle, J., Arnone, R., Carder, K. L., and Davis, C.: Euphotic zone depth: Its derivation and implication to ocean-  
 645 color remote sensing, *Journal of Geophysical Research-oceans*, 112, C03 009, <https://doi.org/10.1029/2006JC003802>, 2007.
- Loeng and  Features of the Physical Oceanographic Conditions of the Barents Sea, *Polar Research*, 10, 5–18, 1991.
- Lydersen, C., Assmy, P., Falk-Petersen, S., Kohler, J., Kovacs, K. M., Reigstad, M., Steen, H., Strom, H., Sundfjord, A., Varpe, O., Walczowski, W., Weslawski, J. M., and Zajaczkowski, M.: The importance of tidewater glaciers for marine mammals and seabirds in Svalbard, Norway, *Journal of Marine Systems*, 129, 452–471, <https://doi.org/10.1016/j.jmarsys.2013.09.006>, 2014.
- 650 Matrai, P. A., Olson, E., Suttles, S., Hill, V., Codispoti, L. A., Light, B., and Steele, M.: Synthesis of primary production in the Arctic Ocean: I. Surface waters, 1954–2007, *Progress in Oceanography*, 110, 93–106, <https://doi.org/10.1016/j.pocean.2012.11.004>, 2013.
- Meire, L., Mortensen, J., Rysgaard, S., Bendtsen, J., Boone, W., Meire, P., and Meysman, F. J. R.: Spring bloom dynamics in a subarctic fjord influenced by tidewater outlet glaciers (Godthåbsfjord, SW Greenland), *Journal of Geophysical Research: Biogeosciences*, 121, 1581–1592, <https://doi.org/10.1002/2015JG003240>, 2015JG003240, 2016.
- 655 Meire, L., Mortensen, J., Meire, P., Juul-Pedersen, T., Sejr, M. K., Rysgaard, S., Nygaard, R., Huybrechts, P., and Meysman, F. J. R.: Marine-terminating glaciers sustain high productivity in Greenland fjords, *Global Change Biology*, 23, 5344–5357, <https://doi.org/10.1111/gcb.13801>, 2017.
- Milner, A. M., Khamis, K., Battin, T. J., Brittain, J. E., Barrand, N. E., Füreder, L., Cauvy-Fraunié, S., Gíslason, G. M., Jacobsen, D., Hannah, D. M., Hodson, A. J., Hood, E., Lencioni, V., Ólafsson, J. S., Robinson, C. T., Tranter, M., and Brown, L. E.:  
 660 Glacier shrinkage driving global changes in downstream systems, *Proceedings of the National Academy of Sciences*, 114, 9770–9778, <https://doi.org/10.1073/pnas.1619807114>, 2017.
- Mölg, T., Cullen, N. J., Hardy, D. R., Kaser, G., and Klok, L.: Mass balance of a slope glacier on Kilimanjaro and its sensitivity to climate, *International Journal of Climatology*, 28, 881–892, <https://doi.org/10.1002/joc.1589>, 2008.
- Mölg, T., Cullen, N. J., Hardy, D. R., Winkler, M., and Kaser, G.: Quantifying Climate Change in the Tropical Midtroposphere over East  
 665 Africa from Glacier Shrinkage on Kilimanjaro, *Journal of Climate*, 22, 4162–4181, <https://doi.org/10.1175/2009JCLI2954.1>, 2009.
- Moses, W. J., Gitelson, A. A., Berdnikov, S., and Povazhnyy, V.: Estimation of chlorophyll-a concentration in case II waters using MODIS and MERIS data-successes and challenges, *Environmental Research Letters*, 4, 045 005, <https://doi.org/10.1088/1748-9326/4/4/045005>, 2009.



- Nilsen, F., Skogseth, R., Vaardal-Lunde, J., and Inall, M.: A Simple Shelf Circulation Model: Intrusion of Atlantic Water on the West Spitsbergen Shelf, *Journal of Physical Oceanography*, 46, 1209–1230, <https://doi.org/10.1175/JPO-D-15-0058.1>, 2016.
- Nordli, O., Przybylak, R., Ogilvie, A. E. J., and Isaksen, K.: Long-term temperature trends and variability on Spitsbergen: the extended Svalbard Airport temperature series, 1898–2012, *Polar Research*, 33, 21–349, <https://doi.org/10.3402/polar.v33.21349>, 2014.
- Nuth, C., Kohler, J., König, M., von Deschanden, A., Hagen, J. O., Kaab, A., Moholdt, G., and Pettersson, R.: Decadal changes from a multi-temporal glacier inventory of Svalbard, *Cryosphere*, 7, 1603–1621, <https://doi.org/10.5194/tc-7-1603-2013>, 2013.
- Piquet, A. M. T., van de Poll, W. H., Visser, R. J. W., Wiencke, C., Bolhuis, H., and Buma, A. G. J.: Springtime phytoplankton dynamics in Arctic Krossfjorden and Kongsfjorden (Spitsbergen) as a function of glacier proximity, *Biogeosciences*, 11, 2263–2279, <https://doi.org/10.5194/bg-11-2263-2014>, 2014.
- Pramanik, A., Van Pelt, W., Kohler, J., and Schuler, T. V.: Simulating climatic mass balance, seasonal snow development and associated freshwater runoff in the Kongsfjord basin, Svalbard (1980–2016), *Journal of Glaciology*, 64, 943–956, <https://doi.org/10.1017/jog.2018.80>, 2018.
- Prospero, J. M., Bullard, J. E., and Hodgkins, R.: High-Latitude Dust Over the North Atlantic: Inputs from Icelandic Proglacial Dust Storms, *Science*, 335, 1078–1082, <https://doi.org/10.1126/science.1217447>, 2012.
- Rysgaard, S. and Nielsen, T. G.: Carbon cycling in a high-arctic marine ecosystem – Young Sound, NE Greenland, *Progress in Oceanography*, 71, 426 – 445, <https://doi.org/10.1016/j.pocean.2006.09.004>, structure and function of contemporary food webs on Arctic shelves: a pan-Arctic comparison, 2006.
- Rysgaard, S., Vang, T., Stjernholm, M., Rasmussen, B., Windelin, A., and Kiilsholm, S.: Physical conditions, carbon transport, and climate change impacts in a northeast Greenland fjord, *Arctic Antarctic and Alpine Research*, 35, 301–312, [https://doi.org/10.1657/1523-0430\(2003\)035\[0301:PCCTAC\]2.0.CO;2](https://doi.org/10.1657/1523-0430(2003)035[0301:PCCTAC]2.0.CO;2), 2003.
- Sakshaug, E.: Primary and Secondary Production in the Arctic Seas, in *The Organic Carbon Cycle in the Arctic Ocean*, pp. 57–81, Springer Berlin Heidelberg, [https://doi.org/10.1007/978-3-642-18912-8\\_3](https://doi.org/10.1007/978-3-642-18912-8_3), 2004.
- Sakshaug, E., Johnsen, G., and Kovacs, K.: *Ecosystem Barents Sea*, Tapir Academic, <https://books.google.no/books?id=2ckz1IGcp-0C>, 2009.
- Sathyendranath, S., Brewin, B., Mueller, D., Doerffer, R., Krasemann, H., Melin, F., Brockmann, C., Fomferra, N., Peters, M., Grant, M., Steinmetz, F., Deschamps, P. Y., Swinton, J., Smyth, T., Werdell, J., Franz, B., Maritorena, S., Devred, E., Lee, Z. P., Hu, C. M., and Regner, P.: Ocean Colour Climate Change Initiative - Approach and Initial Results, 2012 IEEE International Geoscience and Remote Sensing Symposium (IGARSS), pp. 2024–2027, <https://doi.org/10.1109/IGARSS.2012.6350979>, 2012.
- Schuler, T. V., Kohler, J., Elagina, N., Hagen, J. O. M., Hodson, A. J., Jania, J. A., Kääb, A. M., Luks, B., Malecki, J., Moholdt, G., Pohjola, V. A., Sobota, I., and Van Pelt, W. J. J.: Reconciling Svalbard Glacier Mass Balance, *Frontiers in Earth Science*, 8, 156, <https://doi.org/10.3389/feart.2020.00156>, 2020.
- Skamarock, W. C. and Klemp, J. B.: A time-split nonhydrostatic atmospheric model for weather research and forecasting applications, *Journal of Computational Physics*, 227, 3465–3485, <https://doi.org/10.1016/j.jcp.2007.01.037>, 2008.
- Slater, D., Nienow, P., Sole, A., Cowton, T., Mottram, R., Langen, P., and Mair, D.: Spatially distributed runoff at the grounding line of a large Greenlandic tidewater glacier inferred from plume modelling, *Journal of Glaciology*, 63, 309–323, <https://doi.org/10.1017/jog.2016.139>, 2017.
- Spall, M. A., Jackson, R. H., and Straneo, F.: Katabatic Wind-Driven Exchange in Fjords, *Journal of Geophysical Research-oceans*, 122, 8246–8262, <https://doi.org/10.1002/2017JC013026>, 2017.





- Straneo, F. and Cenedese, C.: The Dynamics of Greenland's Glacial Fjords and Their Role in Climate, *Annual Review of Marine Science*, Vol 7, 7, 89–112, <https://doi.org/10.1146/annurev-marine-010213-135133>, 2015.
- 710 Straneo, F., Sutherland, D. A., Stearns, L., Catania, G., Heimbach, P., Moon, T., Cape, M. R., Laidre, K. L., Barber, D., Rysgaard, S., Mottram, R., Olsen, S., Hopwood, M. J., and Meire, L.: The Case for a Sustained Greenland Ice Sheet-Ocean Observing System (GrIOOS), *Frontiers in Marine Science*, 6, 138, <https://doi.org/10.3389/fmars.2019.00138>, 2019.
- Sundfjord, A., Albrechtsen, J., Kasajima, Y., Skogseth, R., Kohler, J., Nuth, C., Skarohamar, J., Cottier, F., Nilsen, F., Asplin, L., Gerland, S., and Torsvik, T.: Effects of glacier runoff and wind on surface layer dynamics and Atlantic Water exchange in Kongsfjorden, Svalbard; a model study, *Estuarine Coastal and Shelf Science*, 187, 260–272, <https://doi.org/10.1016/j.ecss.2017.01.015>, 2017.
- 715 Svendsen, H., Beszczynska-Moller, A., Hagen, J. O., Lefauconnier, B., Tverberg, V., Gerland, S., Orbaek, J. B., Bischof, K., Papucci, C., Zajaczkowski, M., Azzolini, R., Bruland, O., Wiencke, C., Winther, J. G., and Dallmann, W.: The physical environment of Kongsfjorden-Krossfjorden, an Arctic fjord system in Svalbard, *Polar Research*, 21, 133–166, <https://doi.org/10.1111/j.1751-8369.2002.tb00072.x>, 2002.
- Terhaar, J., Lauerwald, R., Regnier, P., Gruber, N., and Bopp, L.: Around one third of current Arctic Ocean primary production sustained by rivers and coastal erosion, *Nature Communications*, 12, 169, <https://doi.org/10.1038/s41467-020-20470-z>, 2021.
- 720 Torsvik, T., Albrechtsen, J., Sundfjord, A., Kohler, J., Sandvik, A. D., Skarohamar, J., Lindback, K., and Everett, A.: Impact of tidewater glacier retreat on the fjord system: Modeling present and future circulation in Kongsfjorden, Svalbard, *Estuarine Coastal and Shelf Science*, 220, 152–165, <https://doi.org/10.1016/j.ecss.2019.02.005>, 2019.
- Tremblay, J. E., Michel, C., Hobson, K. A., Gosselin, M., and Price, N. M.: Bloom dynamics in early opening waters of the Arctic Ocean, *Limnology and Oceanography*, 51, 900–912, <https://doi.org/10.4319/lo.2006.51.2.0900>, 2006.
- 725 Tremblay, J. E., Simpson, K. G., Martin, J., Miller, L., Gratton, Y., Barber, D., and Price, N. M.: Vertical stability and the annual dynamics of nutrients and chlorophyll fluorescence in the coastal, southeast Beaufort Sea, *Journal of Geophysical Research-oceans*, 113, C07S90, <https://doi.org/10.1029/2007JC004547>, 2008.
- van de Poll, W. H., Kulk, G., Rozema, P. D., Brussaard, C. P. D., Visser, R. J. W., and Buma, A. G. J.: Contrasting glacial meltwater effects on post-bloom phytoplankton on temporal and spatial scales in Kongsfjorden, Spitsbergen, *Elementa-science of the Anthropocene*, 6, 50, <https://doi.org/10.1525/elementa.307>, 2018.
- 730 van Pelt, W., Pohjola, V., Pettersson, R., Marchenko, S., Kohler, J., Luks, B., Hagen, J. O., Schuler, T. V., Dunse, T., Noël, B., and Reijmer, C.: A long-term dataset of climatic mass balance, snow conditions, and runoff in Svalbard (1957–2018), *The Cryosphere*, 13, 2259–2280, <https://doi.org/10.5194/tc-13-2259-2019>, 2019.
- Wadham, J. L., De'ath, R., Monteiro, F. M., Tranter, M., Ridgwell, A., Raiswell, R., and Tulaczyk, S.: The potential role of the Antarctic Ice Sheet in global biogeochemical cycles, *Earth and Environmental Science Transactions of the Royal Society of Edinburgh*, 104, 55–67, <https://doi.org/10.1017/S1755691013000108>, 2013.
- 735 Walczowski, W. and Piechura, J.: Influence of the West Spitsbergen Current on the local climate, *International Journal of Climatology*, 31, 1088–1093, <https://doi.org/10.1002/joc.2338>, 2011.
- Xie, J., Bertino, L., Counillon, F., Lisæter, K. A., and Sakov, P.: Quality assessment of the TOPAZ4 reanalysis in the Arctic over the period 1991–2013, *Ocean Science*, 13, 123–144, <https://doi.org/10.5194/os-13-123-2017>, 2017.
- 740 Zajaczkowski, M. and Włodarska-Kowalczyk, M.: Dynamic sedimentary environments of an Arctic glacier-fed river estuary (Adventfjorden, Svalbard). I. Flux, deposition, and sediment dynamics, *Estuarine Coastal and Shelf Science*, 74, 285–296, <https://doi.org/10.1016/j.ecss.2007.04.015>, 2007.

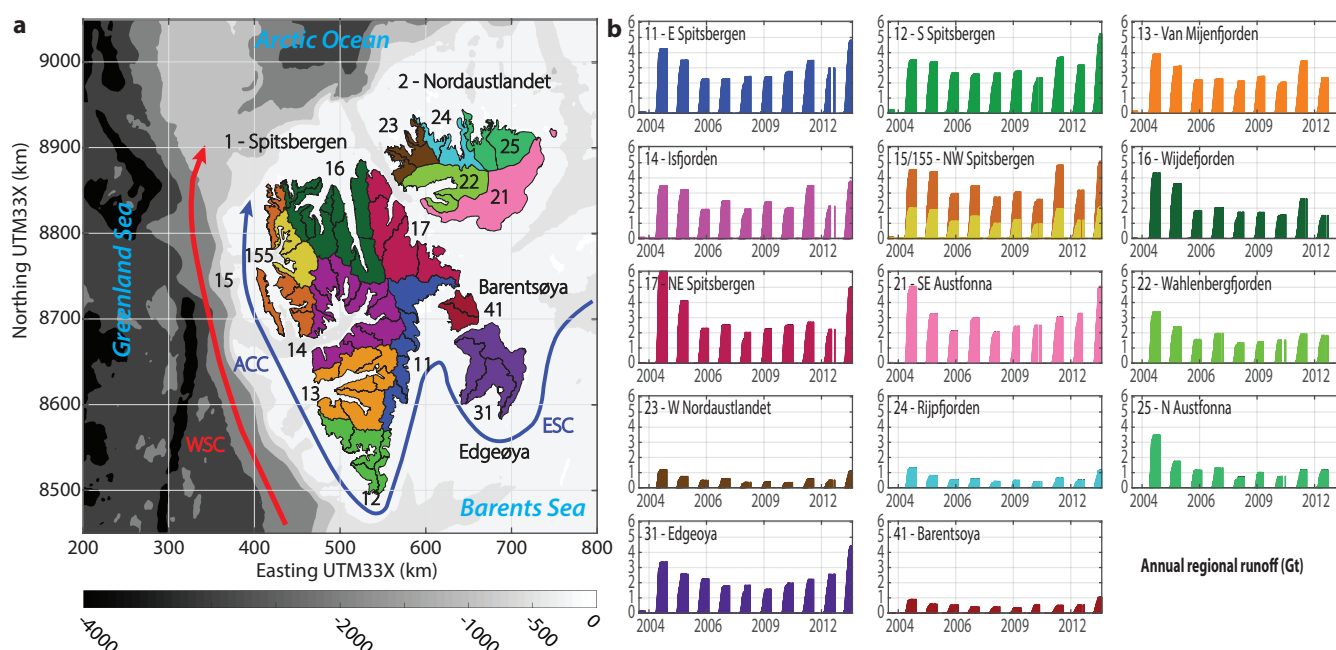

**Figure 1.** (a) Map of Svalbard with 14 primary hydrological regions (2-digit ID number) and one subregion (155 - Kongsfjorden and 156 - Krossfjorden) shown in different colours. Black outlines indicate secondary hydrological regions. The bathymetry is shown in shades of gray (IBCAO dataset). Adjacent seas and major currents are plotted according to Svendsen et al. (2002) where the red arrow delineates the West Spitsbergen Current (WSC) and the blue arrow the Arctic Coastal Current (ACC), originating as East Spitsbergen Current (ESC). (b) Regional timeseries of annual cumulative glacier runoff extracted from climatic mass-balance simulations by Aas et al. (2016).

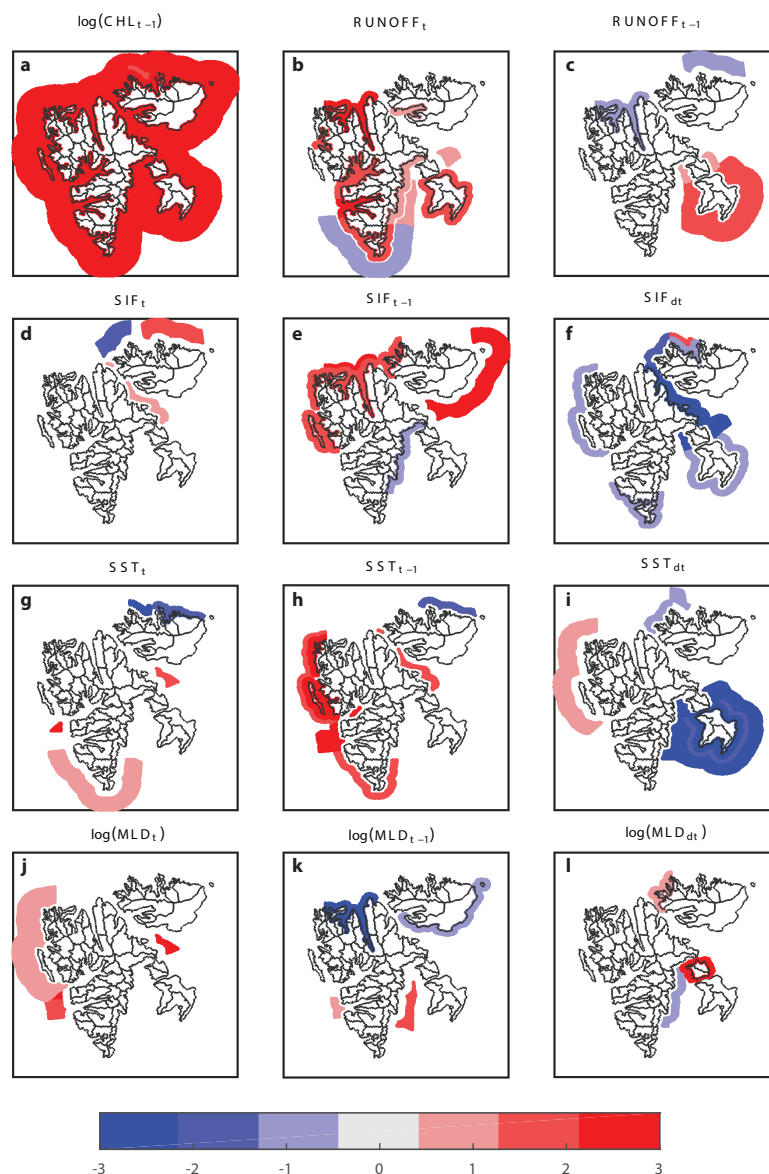

**Figure 2.** Regional significance of environmental variables and their association with the predicted chlorophyll *a* concentrations within 0–10 km, 10–20 km and 20–50 km from the coast: CHL during previous 8-day period (a); glacier runoff, *RUNOFF*, during current and previous 8-day period (b,c) ; current and previous and change in sea ice fraction, *SIF* (d-f), sea-surface temperature, *SST* (g-i) and mixed-layer depth, *MLD* (j-i). Positive association are indicated by red shades and negative by blue. The intensity of the colour showing the level of significance of the association (1:  $P < 0.05$ ; 2:  $P < 0.01$ ; 3:  $P < 0.001$ ).

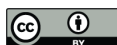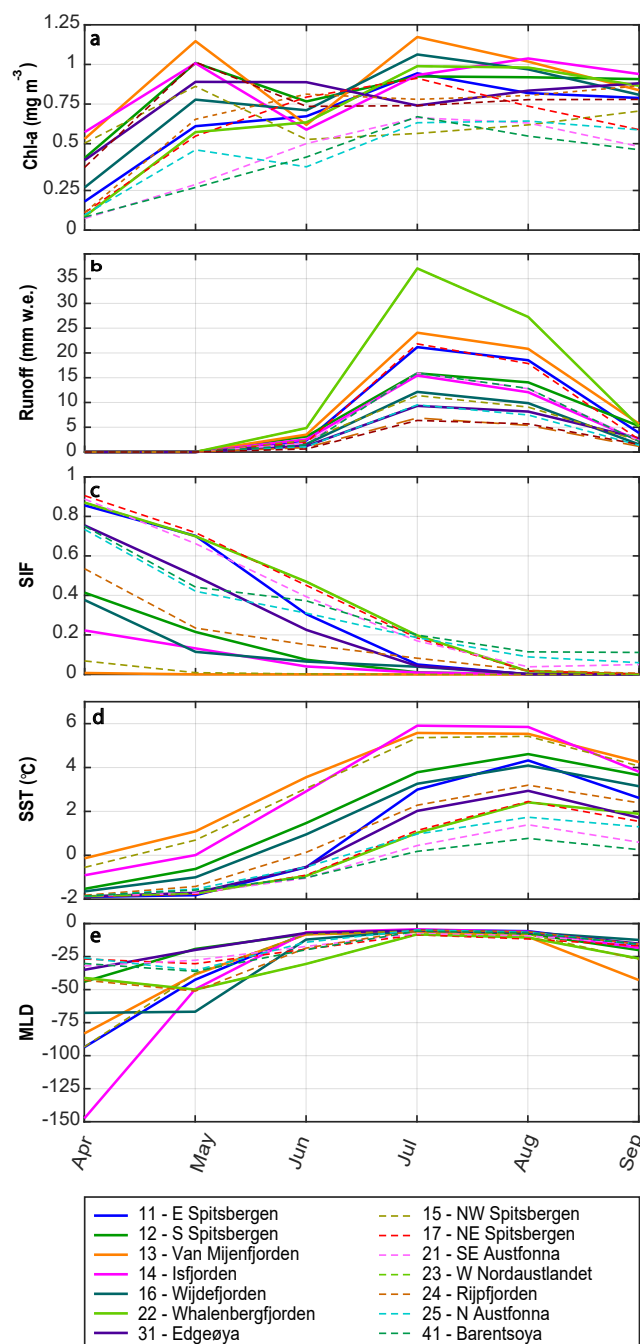

**Figure 3.** Average evolution of monthly variables for all primary hydrological regions and associated marine areas within 10-km distance from the coast: (a) chlorophyll *a* concentration, *CHL*; (b) specific glacier runoff, *RUNOFF*, per marine area; (c) sea ice fraction, *SIF*; (d) sea-surface temperature, *SST*; and (e) mixed-layer depth, *MLD*. Solid lines represent regions that exhibit a significant positive correlation between *RUNOFF*, and *CHL*(a), whereas dashed lines represent regions where no significant correlation was found.

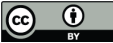

**Table 1.** Glacier configuration and runoff characteristics for primary hydrological regions of Svalbard, including subregion Kongsfjorden-Krossfjorden

| Region<br>(ID-Name)      | Glacier<br>coverage<br>(%) | TWG<br>area<br>(%) | Calving-<br>front length<br>(km) | Specific-runoff rate <sup>*,†</sup>     |             | CHL <sup>*,†</sup>            |            | CHL increase with RUNOFF <sup>‡</sup>                |                                                      |
|--------------------------|----------------------------|--------------------|----------------------------------|-----------------------------------------|-------------|-------------------------------|------------|------------------------------------------------------|------------------------------------------------------|
|                          |                            |                    |                                  | mean<br>(mm w.e. 8-days <sup>-1</sup> ) | annual max  | mean<br>(mg m <sup>-3</sup> ) | annual max | per 10 mm w.e.<br>(% [with 95% confidence interval]) | at peak runoff<br>(% [with 95% confidence interval]) |
| 11-E Spitsbergen         | 71.3                       | 81.1               | 58.2                             | 13.3                                    | 31.4        | 0.8                           | 1.5        | 6.1 [1.3, 11.2]                                      | 20.5 [4.1, 39.4]                                     |
| 12-S Spitsbergen         | 63.5                       | 87.4               | 90.2                             | 10.6                                    | 20.7        | 0.9                           | 1.4        | 8.9 [2.6, 15.6]                                      | 19.3 [5.4, 35]                                       |
| 13-Van Mijenfjorden      | 40.4                       | 42.8               | 12.8                             | 15.1                                    | 33.4        | 0.9                           | 1.5        | 8.9 [4.1, 14]                                        | 33.1 [14.4, 54.7]                                    |
| 14-Isfjorden             | 34.5                       | 40.2               | 31.7                             | 9.3                                     | 19.8        | 0.9                           | 1.3        | 7.8 [2.0, 13.8]                                      | 15.9 [4.1, 29.1]                                     |
| 15-NW Spitsbergen        | 58.5                       | 69.0               | 90.1                             | 8.1                                     | 17.6        | 0.6                           | 0.9        | -                                                    | -                                                    |
| 16-Wijdefjorden          | 40.3                       | 40.7               | 32.2                             | 7.7                                     | 19.9        | 0.9                           | 1.6        | 20.0 [11.1, 29.7]                                    | 43.8 [23.2, 67.9]                                    |
| 17-NE Spitbergen         | 77.9                       | 71.7               | 70.9                             | 13.1                                    | 36.9        | 0.7                           | 1.4        | -                                                    | -                                                    |
| 21-SE Austfonna          | 90.3                       | 89.5               | 117.3                            | 9.9                                     | 23.9        | 0.6                           | 1.1        | -                                                    | -                                                    |
| 22-Wahlenbergfjorden     | 81.2                       | 81.5               | 52.2                             | 22.5                                    | 55.7        | 0.9                           | 1.7        | 7.6 [0.8, 14.9]                                      | 50.2 [4.3, 116.4]                                    |
| 23-W Nordaustlandet      | 42.3                       | 45.0               | 2.2                              | 4.4                                     | 12.2        | 0.8                           | 1.3        | -                                                    | -                                                    |
| 24-Rijpfjorden           | 45.6                       | 39.1               | 13.6                             | 6.3                                     | 17.3        | 0.7                           | 1.3        | -                                                    | -                                                    |
| 25-N Austfonna           | 75.3                       | 94.2               | 29.9                             | 10.1                                    | 30.7        | 0.6                           | 1.4        | -                                                    | -                                                    |
| 31-Edgeøya               | 35.5                       | 48.3               | 23.7                             | 6.0                                     | 13.5        | 0.8                           | 1.2        | 9.5 [2.4, 17.2]                                      | 13.1 [3.2, 23.9]                                     |
| 41-Barentsøya            | 39.5                       | 56.6               | 4.4                              | 4.2                                     | 10.3        | 0.8                           | 1.2        | -                                                    | -                                                    |
| 155-Kongs-/Krossfjorden  | 73.6                       | 76.3               | 35.3                             | 24.1                                    | 53.8        | 0.8                           | 1.5        | 5.2 [1.5, 9]                                         | 31.3 [8.2, 59.3]                                     |
| All regions (mean ± std) | 58.0 ± 19.2                | 64.2 ± 20.3        | 44.3 ± 34.7                      | 11.0 ± 5.9                              | 26.5 ± 14.0 | 0.8 ± 0.1                     | 1.4 ± 0.2  | -                                                    | -                                                    |
| Regs (RUNOFF effect)     | 55.0 ± 19.3                | 62.3 ± 21.0        | 42.0 ± 24.3                      | 13.6 ± 6.7                              | 31.0 ± 16.0 | 0.9 ± 0.1                     | 1.5 ± 0.2  | 9.3 ± 4.6                                            | 28.4 ± 13.5                                          |
| Regs (no RUNOFF effect)  | 61.3 ± 20.0                | 66.4 ± 21.0        | 46.9 ± 45.8                      | 8.0 ± 3.3                               | 21.3 ± 9.8  | 0.7 ± 0.1                     | 1.2 ± 0.23 | -                                                    | -                                                    |

\* Specific-runoff rate, CHL and CHL increase is based on marine area within 10 km from coast.

† Mean and mean-annual maximum values are derived from annual 8-day periods 21–36 during ten subsequent summers 2004–2013.

‡ Mean chlorophyll *a* increase per 10 mm.w.e. 8-days<sup>-1</sup> and at annual maximum runoff. Numbers in squared brackets provide the plausible range at 95% confidence interval.

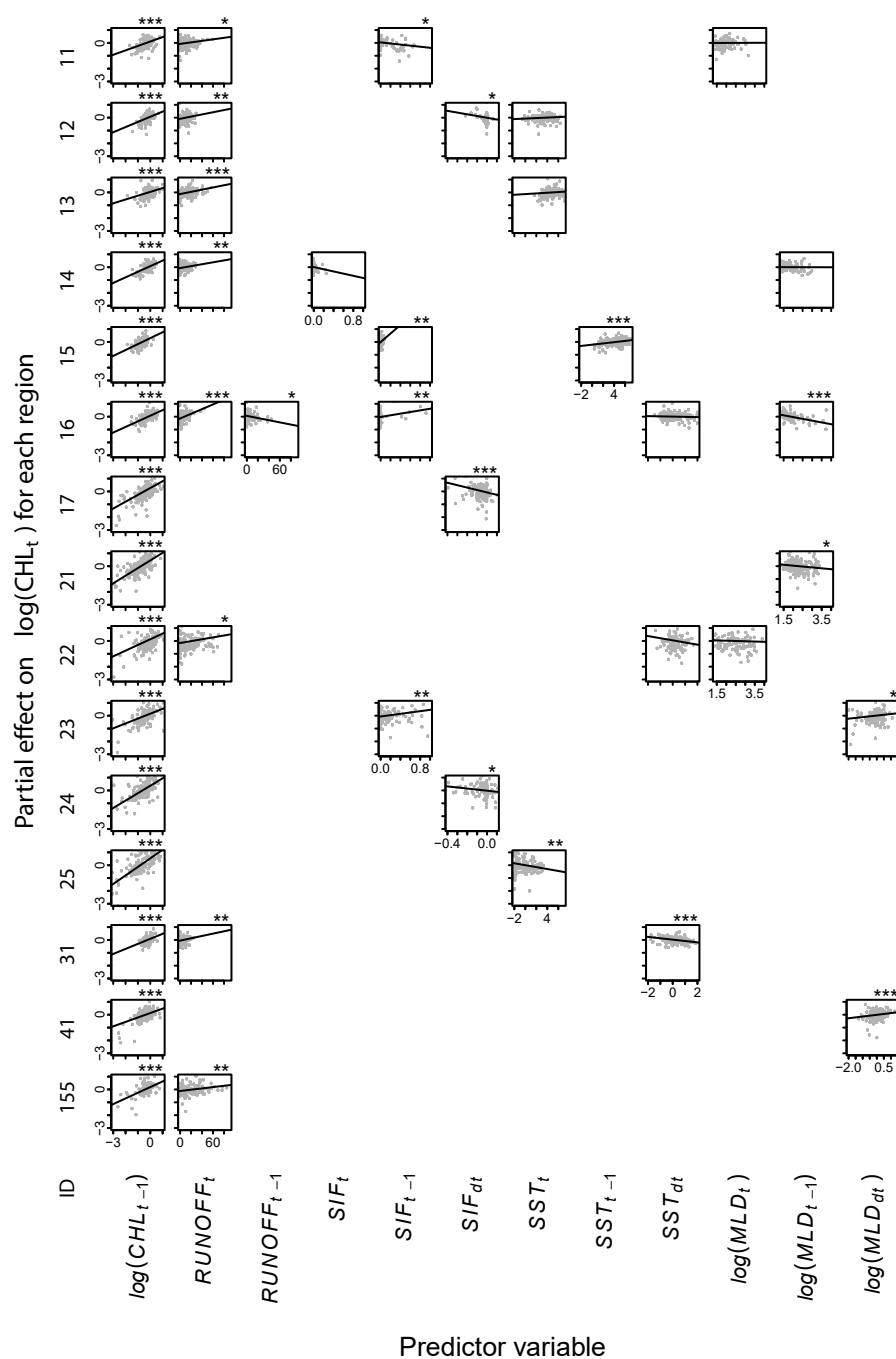

**Figure A1.** Partial effects of environmental variables on chlorophyll *a*, *CHL*, within 10 km from the coast. Each row shows the model (Eq. 1) for one hydrological region (Tab. 1). Each panel shows the relationship between a predictor variable (x-axes) and *CHL* (y-axes), with lines showing estimated partial effects, and points showing partial residuals. Blank panels imply that the variable was not selected. Asterisks show statistical significance at levels 5% (\*), 1% (\*\*) or 0.1% (\*\*\*).



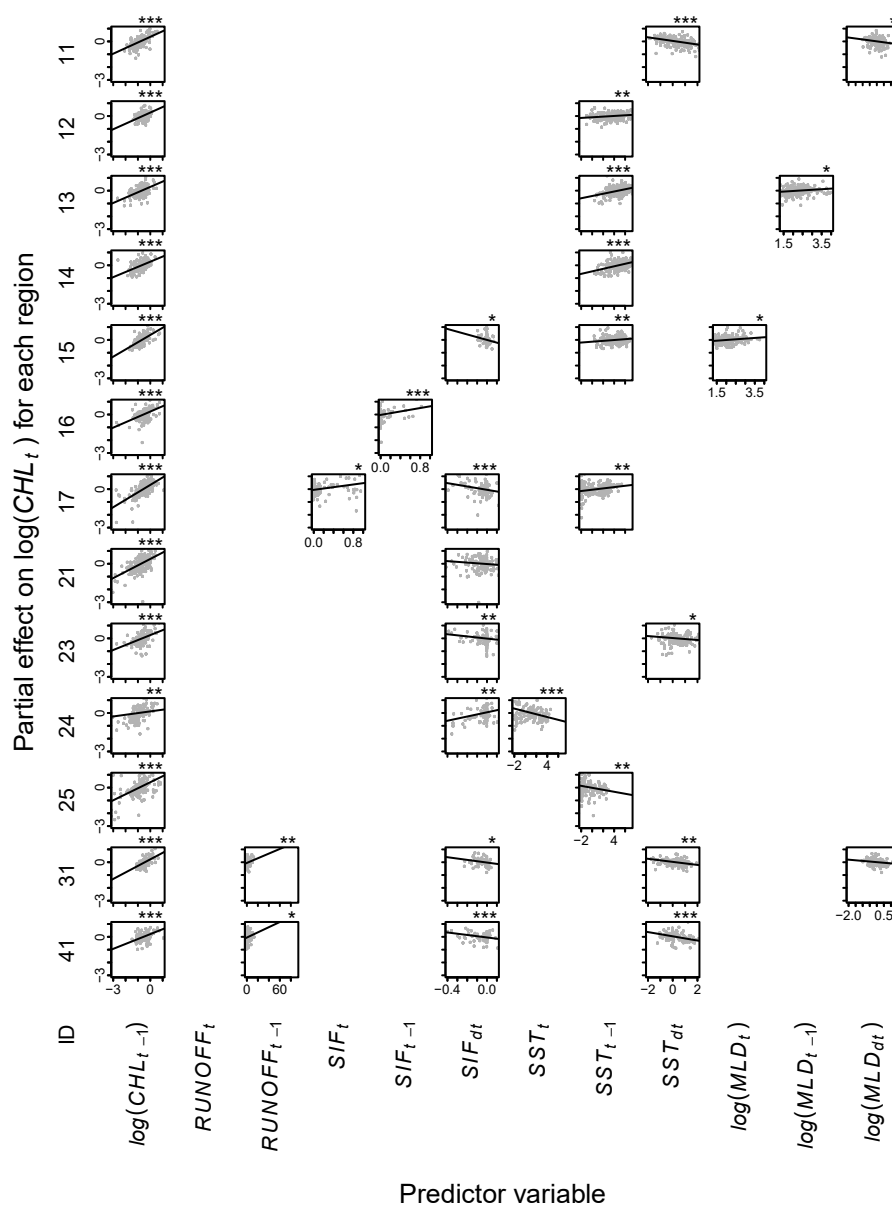

**Figure A2.** Partial effects of environmental variables on chlorophyll *a*, *CHL*, within 10 to 20 km from the coast. Each row shows the model (Eq. 1) for one hydrological region (Tab. 1). Each panel shows the relationship between a predictor variable (x-axes) and *CHL* (y-axes), with lines showing estimated partial effects, and points showing partial residuals. Blank panels imply that the variable was not selected. Asterisks show statistical significance at levels 5% (\*), 1% (\*\*) or 0.1% (\*\*\*).

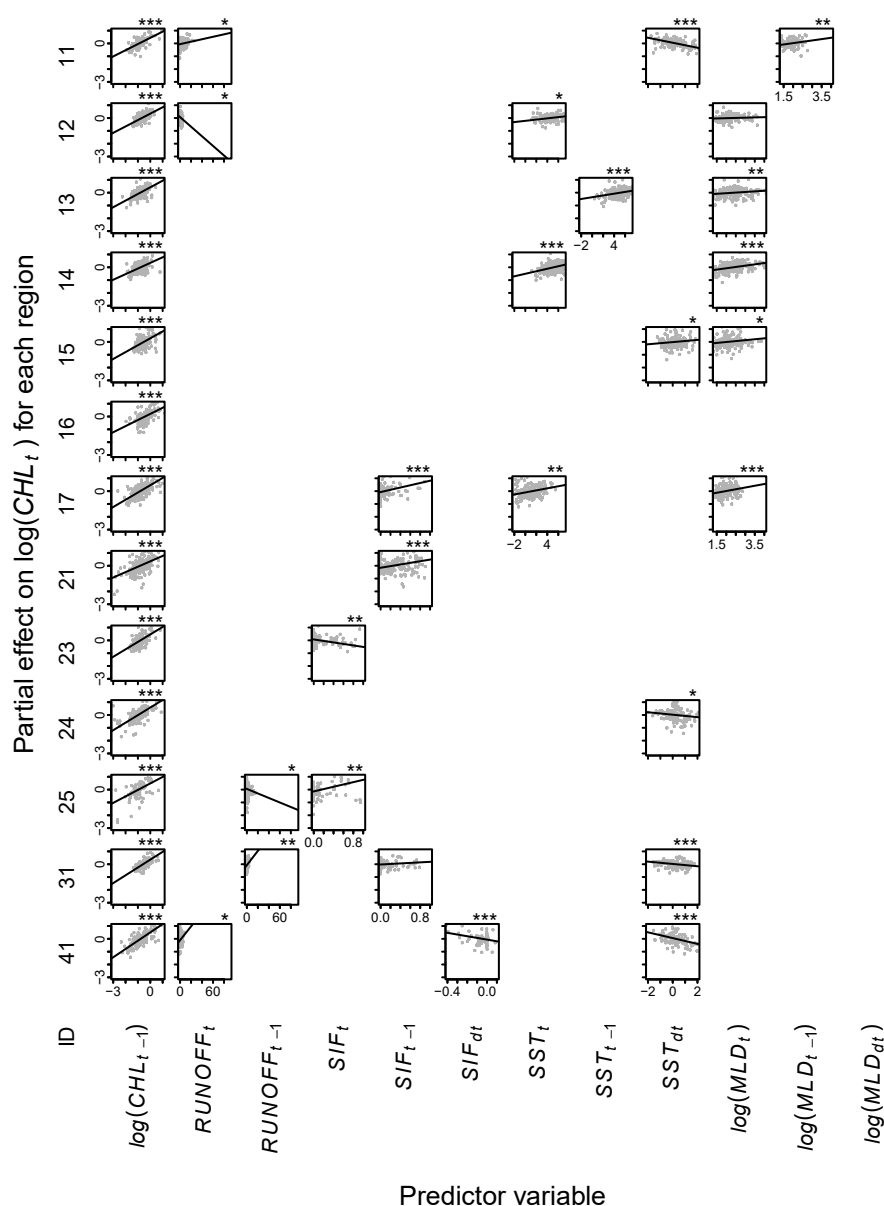

**Figure A3.** Partial effects of environmental variables on chlorophyll *a*, *CHL*, within 20 to 50 km from the coast. Each row shows the model (Eq. 1) for one hydrological region (Tab. 1). Each panel shows the relationship between a predictor variable (x-axes) and *CHL* (y-axes), with lines showing estimated partial effects, and points showing partial residuals. Blank panels imply that the variable was not selected. Asterisks show statistical significance at levels 5% (\*), 1% (\*\*) or 0.1% (\*\*\*).
